1 **Identification of Cancer-Associated Fibroblasts in Glioblastoma and Defining Their**  
2 **Pro-tumoral Effects**

3 Saket Jain,<sup>1‡</sup> Jonathan W. Rick,<sup>1‡</sup> Rushikesh Joshi,<sup>1</sup> Angad Beniwal,<sup>1</sup> Jordan Spatz,<sup>1</sup>  
4 Alexander Chih-Chieh Chang,<sup>1</sup> Alan T. Nguyen,<sup>1</sup> Sweta Sudhir,<sup>1</sup> Ankush Chandra,<sup>1</sup> Alex  
5 Haddad,<sup>1</sup> Harsh Wadhwa,<sup>1</sup> Sumedh S. Shah,<sup>1</sup> Serah Choi,<sup>1</sup> Josie L. Hayes,<sup>1</sup> Lin Wang,<sup>1</sup>  
6 Garima Yagnik,<sup>1</sup> Joseph F. Costello,<sup>1</sup> Aaron Diaz,<sup>1</sup> and Manish K. Aghi<sup>1</sup>

7  
8 <sup>1</sup>Department of Neurosurgery; University of California San Francisco (UCSF)

9  
10 Corresponding author: Manish K. Aghi, MD, PhD; Professor of Neurological Surgery;  
11 UCSF; Diller Cancer Research Building; 1450 Third Street Rm HD-465; San Francisco,  
12 CA 94158; 415-353-1172; 415-353-3907 FAX; manish.aghi@ucsf.edu

13  
14 Keywords: fibroblasts, glioblastoma, stem cells, EDA fibronectin

15  
16 Running title: Cancer-associated fibroblasts in glioblastoma

17  
18 The authors have declared that no conflict of interest exists.

19  
20 ‡Authors contributed equally to this work

21

22

23

24 **ABSTRACT**

25

26 Despite their identification in some cancers, pro-tumoral cancer-associated fibroblasts  
27 (CAFs) were presumed absent in glioblastoma given the lack of brain fibroblasts. Serial  
28 trypsinization of primary glioblastoma cultures yielded cells with CAF morphology, CAF  
29 transcriptomic profile, and mesenchymal lineage in single-cell RNA-seq. Glioblastoma  
30 CAFs were attracted to glioblastoma stem cells (GSCs) and CAFs enriched GSCs. We  
31 created a resource of inferred crosstalk by mapping expression of receptors to their  
32 cognate ligands, identifying PDGF- $\beta$  and TGF- $\beta$  as mediators of GSC effects on CAFs,  
33 and osteopontin and hepatocyte growth factor as mediators of CAF-induced GSC  
34 enrichment. Glioblastoma CAFs also induced M2 macrophage polarization by producing  
35 the EDA fibronectin variant. Glioblastoma CAFs were enriched in the subventricular zone  
36 which houses neural stem cells that produce GSCs. Including CAFs in GSC-derived  
37 xenografts induced *in vivo* growth. These findings are among the first to identify  
38 glioblastoma CAFs and their GSC interactions, making them an intriguing target.

39

40

## 41 INTRODUCTION

42

43 Glioblastoma (GBM) is an aggressive primary brain cancer with a poor prognosis.<sup>1</sup>

44 Current therapies have failed in large part because they treat GBM cells in isolation and

45 fail to account for the recent understanding that GBM is an organ with complex interplay

46 between tumor cells and their microenvironment.<sup>2</sup> In terms of the cellular makeup of the

47 GBM microenvironment, while numerous studies have focused on endothelial cells<sup>3</sup> and

48 immune cells,<sup>4</sup> little attention has been paid to whether cancer-associated fibroblasts

49 (CAFs), a cell type described as the most important one in the stroma of carcinomas,<sup>5</sup>

50 exist in GBM. While many have presumed the lack of CAFs in GBM based on the lack of

51 fibroblasts in the central nervous system,<sup>6</sup> some studies have identified cells expressing

52 markers associated with CAFs in GBM.<sup>7-9</sup> However, these studies fail to comprehensively

53 profile the effects of the identified cells on every component of GBM and its

54 microenvironment. More importantly, the reliance of these studies on cell surface markers

55 without comprehensive gene expression profiling raises the possibility that the identified

56 cells could be other cells in the microenvironment such as pericytes, which share

57 overlapping cell surface markers with fibroblasts.<sup>10</sup>

58 To directly address this knowledge gap, we used a serial trypsinization method

59 described for isolating CAFs in other cancers<sup>11</sup> and analyzed the resulting cells

60 transcriptomically to verify that they were CAFs based on their gene expression profile.

61 We used single-cell lineage trajectory analysis to define the origin of these cells. And, we

62 comprehensively determined the effects of these cells on GBM cells and the GBM

63 microenvironment *in vivo*.

## 64 RESULTS

### 65 *Identifying CAFs in GBM by Serial Trypsinization*

66 To determine whether a CAF-like population existed in GBM, we used an  
67 established serial trypsinization method<sup>11</sup> in which dissociated GBM patient samples were  
68 cultured for five weeks in DMEM/F12 with 10% fetal bovine serum. Cells underwent media  
69 change every 4 days and serial trypsinization to remove less adherent tumor cells,  
70 resulting in retention of cells resistant to trypsinization that have been confirmed to be  
71 CAFs in other cancers.<sup>11</sup> Within five weeks of culturing cells isolated from newly  
72 diagnosed patient GBM samples in this manner, a population of cells emerged that  
73 uniformly exhibited the large spindle-shaped morphology that has been described for  
74 CAFs and fibroblasts.<sup>12</sup>

75 We quantified the morphology of these cells by developing a modified version of  
76 visually-aided morpho-phenotyping recognition (VAMPIRE) analysis<sup>13</sup> to classify and  
77 compare irregular cellular and nuclear shapes. By pairing nuclear and cytoplasm datasets  
78 by cell, we generated a 16 data-point profile for each cell. We then designed a machine  
79 learning logistic regression classifier utilizing breast cancer CAF data (**Supp. Fig. 1**) and  
80 GBM cell line data (**Supp. Fig. 2**) to achieve a nominal accuracy of 91% in distinguishing  
81 GBM cells from CAFs. Our classifier identified 77% of the cells isolated from serial  
82 trypsinization of patient GBMs as exhibiting CAF morphology. In contrast, when patient  
83 GBM samples were grown in culture without serial trypsinization, the classifier found GBM  
84 cells predominated at 82%, reducing the population of cells with CAF morphology to 18%  
85 ( $P < 0.0001$ ; **Figs. 1A-B**), supporting our hypothesis that these cells isolated by serial

86 trypsinization were CAFs and underscoring the importance of serial trypsinization in  
87 isolating this CAF population from GBM.

88 We then performed bulk RNA-seq to analyze the gene expression profile of these  
89 CAF-like cells that we had identified in patient GBMs. Bulk RNA-seq revealed that these  
90 CAF-like cells in GBM exhibited a transcriptomic profile (**Supp. Table 1**) similar to the  
91 published profile of breast cancer CAFs<sup>14</sup> but different from that of pericytes,<sup>15</sup> a cell type  
92 with some overlap in morphology and cell surface marker expression with CAFs (**Fig.**  
93 **1C**). We also compared these CAF-like cells to normal fibroblasts from 8 different tissues,  
94 revealing that these cells most closely resembled dermal fibroblasts<sup>16</sup> (**Fig. 1C**) compared  
95 to normal fibroblasts from seven other tissues<sup>17</sup> (**Supp. Fig. 3**). Together, these findings  
96 supported the hypothesis that these cells were GBM CAFs.

97  
98 *Assessing GBM CAF heterogeneity and identifying CAFs in GBM using single cell-*  
99 *sequencing*

100 We then carried out single-cell RNA sequencing (scRNA-seq) to assess the  
101 expression of CAF markers in 7,276 cells isolated from patient GBM by serial  
102 trypsinization. As has been shown with other cancers,<sup>18</sup> CAF markers were expressed by  
103 large numbers of these cells isolated by serial trypsinization of patient GBMs but not in a  
104 uniform manner, including *ACTA2* (encodes  $\alpha$ -SMA, 55% of cells), *TNC* (35% of cells),  
105 *PDGFRB* (12.5% of cells), *CO11A1* (24.6% of cells), and *PDPN* (27.8% of cells) (**Figs.**  
106 **1D-E; Supp. Fig. 4**), findings corroborated at the protein level by flow cytometry (**Supp.**  
107 **Fig. 5**). In contrast, markers expressed by cells sharing some lineage with CAFs but not  
108 by CAFs were absent from most of the cells isolated from GBM by serial trypsinization,

109 including *EPCAM*, an epithelial cell marker only expressed by 0.07% of the cells; *SMTN*,  
110 a smooth muscle cell marker expressed by only 4% of the cells; and *PECAM1*, an  
111 endothelial cell marker expressed by only 10.7% of the cells.

112 Cluster analysis revealed 9 clusters within these cells arising through serial  
113 trypsinization of GBM (**Figs. 1D-E**). In terms of CAF markers from other cancers,  $\alpha$ SMA  
114 was expressed in all 9 clusters, while PDGFRB and COL11A1 were expressed in Cluster  
115 4 and 7. While most of these cells had a CAF-like profile, we observed a cluster  
116 representing pericytes and a separate cluster of macrophages and endothelial cells. We  
117 also observed a cluster containing mesenchymal cells and CAF-like cells, suggesting a  
118 mesenchymal lineage of CAFs.

119 We then sought to determine if population(s) of cells expressing these CAF  
120 markers could be identified in scRNA-seq of GBMs. To do so, we analyzed previously  
121 archived scRNA-seq results from 8 patient GBMs.<sup>19</sup> Using the Seurat 10x genomic  
122 workflow to analyze the dataset, we identified the 23386 most variable genes across  
123 12074 cells. We used shared nearest neighbor clustering and ran a non-dimensional  
124 reduction technique UMAP to identify and visualize 18 robust cell clusters (**Supp. Fig.**  
125 **6**). Analysis of these clusters revealed dense expression of *MCAM*, whose expression in  
126 our CAF-like cells cultured by serial trypsinization was higher than in pericytes ( $\log_2(\text{Fold}$   
127  $\text{Change})=7.7$ ;  $P=4.2 \times 10^{-11}$ ; **Supp. Table 1**), in cluster 13, and preferential expression of  
128 platelet-derived growth factor receptor-like (*PDGFRL*), a previously described pericyte  
129 marker<sup>20</sup> whose expression in our CAF-like cells cultured by serial trypsinization was  
130 lower than in pericytes ( $\log_2(\text{Fold Change})=-3.2$ ;  $P=0.04$ ; **Supp. Table 1**) in cluster 1 (**Fig.**  
131 **1F**). These two clusters were part of a lineage trajectory when analyzed by Slingshot,<sup>21</sup> a

132 top-ranked trajectory inference tool<sup>22</sup> (**Fig. 1F**). Slingshot lineage trajectory analysis also  
133 identified a link between these two clusters (1 and 13) and cluster 12, which contained  
134 cells expressing mesenchymal stem cell (MSC) markers THY1, BMPR2, and PDGFR- $\alpha$ <sup>23</sup>  
135 (**Supp. Fig. 7**). These findings suggested possible shared origin of CAFs and pericytes  
136 from MSCs, with pericytes and CAFs in clusters 1 and 13 also expressing these MSC  
137 markers albeit not as frequently or strongly as the MSCs in cluster 12.

138

### 139 *CAF production of fibronectin in GBM*

140 Because our RNA-seq analysis revealed that the ECM protein fibronectin (*FN1*  
141 gene) was differentially expressed in GBM ( $\log_2(\text{Fold Change})=5.3$ ;  $P=6.9 \times 10^{-22}$ ) and  
142 breast cancer CAFs ( $\log_2(\text{Fold Change})=2.6$ ;  $P=9.9 \times 10^{-6}$ ) relative to pericytes (**Supp.**  
143 **Table 1**), particularly the former, and because fibronectin has been shown to be the most  
144 abundant ECM protein in GBM,<sup>24</sup> we then further analyzed CAF expression of *FN1*.

145 First, to verify that fibronectin was differentially expressed between GBM versus  
146 normal brain, using the GlioVis databank, we queried the expression of fibronectin (*FN1*)  
147 in GBM and non-tumor control brain tissue. We found that GBM had significantly higher  
148 expression of *FN1* than non-tumor brain samples ( $P<0.001$ , **Supp. Fig. 8A**). GBM also  
149 had much higher expression of *FN1* than low grade gliomas ( $P<0.001$ , **Supp. Fig. 8B**).

150 Because fibronectin lacking splice variants is not a component of cancer  
151 pathogenesis, we next analyzed expression of total fibronectin and its extra-domain A  
152 (EDA) splice variant in GBM CAFs, tumor-associated macrophages (TAMs), and tumor  
153 cells. qPCR revealed 32-fold elevation of total fibronectin and 16-fold elevation of the EDA  
154 splice variant in CAFs relative to TAMs ( $P=0.002-0.004$ ; **Fig. 1G**) and tumor cells

155 (P=0.002; **Fig. 1G**), suggesting that EDA is a more specific GBM CAF biomarker than the  
156 cell surface receptors described for other CAFs (**Fig. 1E**). Transcriptomic analysis also  
157 revealed a positive correlation between patient GBM expression of EDA and aggregate  
158 expression of the mesenchymal subtype genes *CHI3LI*, *TIMP1*, and *SPOCD1* that confer  
159 a worse prognosis (P=0.0012; **Fig. 1H**).<sup>25</sup>

160 In terms of microscopic intratumoral EDA distribution, immunofluorescence (IF)  
161 confirmed expression of the EDA splice variant of fibronectin in GBM patient specimens  
162 in close proximity to cells expressing PDGFR- $\beta$  (**Fig. 1I**; **Supp. Fig. 9**), a CAF marker  
163 identified from other cancers that we also found to be expressed by a portion of the cells  
164 we isolated by serial trypsinization of patient GBMs (**Fig. 1E**). While the pattern of EDA  
165 staining resembled blood vessels structurally (**Fig. 1I**), co-staining for CD31 and EDA  
166 revealed distinct distribution of blood vessels from areas of EDA deposition (**Supp. Fig.**  
167 **10**).

168 Interestingly, co-staining of PDGFR- $\beta$  with CD31 revealed PDGFR- $\beta$ <sup>+</sup> cells to  
169 reside in the perivascular niche in the same degree of close proximity to blood vessels  
170 exhibited by tumor-initiating Nestin<sup>+</sup> GBM stem-like cells (GSCs) that have been shown  
171 to give rise to GBM cells<sup>26</sup> (P=0.3; **Fig. 1I**). Some PDGFR- $\beta$ <sup>+</sup> cells were intimately  
172 attached to vessels in a manner not seen with Nestin<sup>+</sup> cells (**Fig. 1I**), consistent with some  
173 of these PDGFR- $\beta$ <sup>+</sup> cells being pericytes.

174

#### 175 *CAFs induce pro-tumoral effects on GBM stem cells*

176 In light of the location of these GBM CAFs in the perivascular niche alongside  
177 tumor-initiating GSCs, we then analyzed the effects of GBM CAFs on these GSCs. This



178 was done by taking GSC-containing neurospheres derived from GBM6 GBM cells and  
179 culturing them in conditioned media (CM) from GBM CAFs for 72 hours. These cells were  
180 then transcriptomically assessed and compared to GBM6 neurospheres in control media  
181 using the NanoString nCounter platform and a 770 gene multiplex to analyze expression  
182 of genes from various step in the cancer progression process including angiogenesis,  
183 extracellular matrix (ECM) remodeling, epithelial-to-mesenchymal transition (EMT), and  
184 invasion. The analysis revealed that secreted factors from GBM CAFs upregulated the  
185 Ras, VEGF, MAPK, PI3K-Akt, and HIF-1 signaling pathways in GSCs ( $P < 0.002$ ; **Figs.**  
186 **2A-C**).

187 We then analyzed the functional consequences of these transcriptomic changes  
188 that CAF CM induced in the GSC-enriched GBM neurospheres. Culturing GSC-  
189 containing neurospheres derived from luciferase-expressing GBM43 GBM cells in CM  
190 from GBM CAFs for 72 hours led to increased bioluminescence (BLI) compared to  
191 growing these cells in neurosphere media ( $P < 0.001$ ; **Fig. 2D**). Consistent with these  
192 results, incubating GSC-containing neurospheres derived from DBTRG-05MG GBM cells  
193 in GBM CAF CM for 24 hours also increased the expression of GBM stem cell genes  
194 Nanog 6.7-fold ( $P = 0.009$ ), Sox2 5.0-fold ( $P < 0.001$ ), and Oct4 3.0-fold ( $P = 0.005$ ) (**Fig.**  
195 **2E**).

196 To investigate potential mediators of CAF effects on GSCs, we created a resource  
197 of inferred crosstalk by mapping the expression of receptors expressed by GSCs to that  
198 of their cognate ligands/agonists expressed by CAF cells, using our RNA-seq results from  
199 GBM CAFs and published RNA-seq results from GBM6-derived neurospheres<sup>27</sup> (**Fig. 2F**;  
200 **Supp. Table 2**). Based on these results, in investigating the mediators causing CAFs to

201 promote GSC enrichment, we focused on osteopontin (OPN) and its receptor CD44 and  
202 hepatocyte growth factor (HGF) and its receptor c-Met which appeared in our GSC-CAF  
203 receptor-ligand analysis (**Supp. Table 2**). We therefore carried out a neurosphere  
204 formation assay in the presence of anti-OPN and/or anti-HGF antibodies. CAF CM  
205 increased the total neurosphere area, which accounts for both the total number and size  
206 of neurospheres, per high power field ( $P < 0.001$ ), effects mitigated by either anti-HGF  
207 ( $P < 0.001$ ) or anti-OPN ( $P < 0.001$ ), with the combination of anti-HGF and anti-OPN  
208 reducing the total neurosphere area more than either antibody alone ( $P < 0.001$ ) (**Fig. 2G**).  
209 These results suggest that the increased neurosphere formation in CAF CM is mediated  
210 through both the OPN-CD44 and HGF-cMET axes.

211 We then determined whether CAFs chemotactically attracted GSCs. We  
212 performed a chemotaxis assay comparing the migration of neurospheres derived from  
213 GBM6 cells towards control media or CAF CM and found no difference in the levels of  
214 chemotaxis between these conditions ( $P = 0.1$ ; **Supp. Fig. 11**).

215  
216 *GBM stem cells mediate CAF invasion and proliferation via PDGF and TGF- $\beta$  pathways*

217 Given that fibroblasts do not typically reside in the central nervous system, we  
218 sought to determine what factors attract CAFs to GBM. We hypothesized that GSCs may  
219 recruit CAFs to the perivascular niche of GBM. In order to ascertain if CAFs were attracted  
220 to GSCs, we assessed the trans-Matrigel chemotactic response of CAFs to GSC CM  
221 (**Fig. 3A**). We found that GSC CM attracted CAFs 5-times as much as neurosphere  
222 control media (58.9 vs 12.8 cells per hpf;  $P < 0.001$ ; **Fig. 3B**).

223 We also wanted to determine if GSCs could contribute to the enrichment of CAFs  
224 via direct proliferation. We found that, at 120 hours, the number of CAFs grown in GSC  
225 CM increased over 4-fold, while CAFs grown in neurosphere control media did not grow  
226 during the same time interval ( $P < 0.001$ ; **Fig. 3C**; **Supp Fig. 12**; **Supp. Table 3**).

227 Then, to investigate potential mediators of these GSC effects on CAFs, we created  
228 the converse of our map between CAF ligands/agonists and GSC receptors (**Fig. 2D**) by  
229 mapping the expression of receptors expressed by CAFs to that of their cognate  
230 ligands/agonists expressed by GSCs, using the RNA-seq results described above (**Fig.**  
231 **3D**; **Supp. Table 2**). Using this resource, to investigate the mediators enabling GSCs to  
232 chemotactically recruit CAFs and stimulate their proliferation, we focused on PDGF and  
233 TGF- $\beta$  since both appeared in our GSC-CAF ligand-receptor analysis (**Fig. 3D**; **Supp.**  
234 **Table 2**) and both have receptors present on a majority of CAFs studied to date.<sup>28</sup> Varying  
235 concentrations of neutralizing antibodies to TGF- $\beta$  or PDGF were placed in the GSC CM  
236 before the Boyden chamber and CAFs were applied. The TGF- $\beta$  neutralizing antibodies  
237 did not inhibit invasion at concentrations ranging from 2.5 to 10  $\mu\text{g}/\text{mL}$  ( $P = 0.2-0.4$ ; **Fig.**  
238 **3E**). PDGF neutralizing antibodies, however, significantly reduced the number of invading  
239 cells at 5 and 10  $\mu\text{g}/\text{mL}$  ( $P = 0.002$ ; **Fig. 3E**). In terms of mediators of GSC-induced CAF  
240 proliferation, while 5  $\mu\text{g}/\text{mL}$  neutralizing antibody against PDGF ( $P = 0.7-0.9$ ) or 1  $\mu\text{g}/\text{mL}$   
241 neutralizing antibody against TGF- $\beta$  ( $P = 0.5-0.9$ ) did not affect GSC CM-induced CAF  
242 proliferation, combining neutralizing antibodies against PDGF and TGF- $\beta$  at these  
243 concentrations reversed GSC-induced CAF proliferation ( $P = 0.002-0.02$ ; **Fig. 3F**).

244

245 *CAFs fail to induce pro-tumoral effects on non-stem GBM cells*

246 We then analyzed whether GBM CAFs exerted protumoral effects on non-stem  
247 adherent GBM cells similar to the protumoral effects we found them to have on GBM stem  
248 cells. Addition of CM from GBM CAFs to non-stem adherent DBTRG-05MG cells caused  
249 no change in mesenchymal gene expression ( $P=0.8$ ; **Supp. Fig. 13A**). There were also  
250 no phenotypic effects of GBM CAFs on non-stem GBM cells, as addition of CM from GBM  
251 CAFs to non-stem adherent GBM6 cells caused no change in tumor cell morphology as  
252 assessed by shape factor<sup>29</sup> ( $P=0.06-0.8$ ; **Supp. Fig. 13B**), invasion in Matrigel chambers  
253 ( $P=0.5$ ; **Supp. Fig. 13C**), or proliferation ( $P=0.3-0.9$ ; **Supp. Fig. 13D**) of the GBM cells.  
254 These results show that the pro-tumoral effects of GBM CAFs are specific to GSCs.

255

256 *Cultured GBM CAFs induce angiogenesis and M2 macrophage polarization via the*  
257 *EDA-TLR4 axis*

258 We then investigated whether CAFs influence other cells in the tumor  
259 microenvironment. We started by investigating the effects of CAFs on endothelial cells  
260 because of our finding that CAF CM activated VEGF signaling in GSCs (**Fig. 2C**). We  
261 found that adding CAF CM to cultured HUVEC cells increased all three stages of  
262 angiogenesis: expansion of the network by tip cells, tubule formation, and fusion of the  
263 newly formed vessels.<sup>30</sup> Specifically, CAF CM significantly increased expansion at 4  
264 hours, extension at 8 hours, and mesh fusion at 16 hours (**Fig. 4A; Supp. Figs. 14-17**).  
265 Additionally, we found that a serial CM experiment in which HUVEC cells were grown in  
266 CM taken from GBM6 cells grown in CAF CM led to a significant increase in mesh  
267 formation and fusion compared to growing in HUVECs in CAF CM alone (**Fig. 4A; Supp.**

268 **Figs. 14-17**), indicating an additional possible synergistic effect between CAFs and GBM  
269 cells in the process of angiogenesis.

270 We then investigated the effects of CAFs on the macrophages that comprise up to  
271 40% of the mass of a GBM.<sup>31</sup> We found that CAF CM and the EDA splice variant of  
272 fibronectin that they produce cause M2 polarization of cultured macrophages derived from  
273 human monocytes isolated from peripheral blood in a manner not seen with plasma  
274 fibronectin lacking the EDA splice variant (P=0.01; **Fig. 4B**). Similarly, when the THP-1  
275 immortalized monocyte-like cell line was differentiated into macrophages followed by  
276 incubation in CAF CM, CAF CM drove more M2 polarization than achieved with a cytokine  
277 positive control known to drive M2 polarization (P=0.03; **Fig. 4C**). The effects of CAF CM  
278 on M2 polarization of cultured macrophages derived from human monocytes isolated from  
279 peripheral blood were reversed by a blocking antibody against toll-like receptor 4 (TLR4),  
280 a known receptor for EDA fibronectin<sup>32</sup> (P=0.01; **Fig. 4D**). While CAFs caused M2  
281 macrophage polarization, CAFs did not induce macrophage proliferation (P=0.3-0.9; **Fig.**  
282 **4E**) or chemotaxis (P=0.7; **Fig. 4F**).

283

#### 284 *Regional variation in CAF localization in GBM*

285 In order to evaluate variation in CAF localization between different tumor regions,  
286 we acquired site-directed biopsies from different regions of patient GBMs. We included  
287 regions of GBM described by our group<sup>33</sup> and others:<sup>34</sup> (1) tumor core; (2) leading edge  
288 of tumor enhancement; and (3) peritumoral brain zone (PBZ), the non-enhancing FLAIR  
289 bright regions surrounding the tumor (**Fig. 5A**). Because of our finding that CAFs interact  
290 with tumor-initiating GSCs, we also sampled tissue from the subventricular zone (SVZ),

291 the largest germinal zone in the brain found along the lateral walls of the lateral ventricles  
292 which houses the neural stem cells felt to give rise to GSCs,<sup>35</sup> in cases where tumor  
293 involved this area. We then performed qPCR for fibronectin and its EDA and EDB splice  
294 variants, revealing that samples taken from SVZ GBM had 22-fold increased expression  
295 of CAF-specific EDA and 22-fold increased total FN expression, but just 5-fold increased  
296 EDB expression normalized relative to the tumor core (**Fig. 5B**). Consistent with these  
297 results, IF revealed SVZ GBM to be enriched for EDA fibronectin (**Fig. 5C**). These SVZ  
298 GBM areas were also enriched by flow cytometry for cells expressing  $\alpha$ -SMA, a marker  
299 expressed by many of our cultured CAF cells (**Fig. 1E**), with 4.9% of cells from the tumor  
300 core expressing  $\alpha$ -SMA compared to 13.4% of the cells from SVZ areas of GBM ( $P=0.02$ ;  
301 **Fig. 5D**). IF for PDGFR- $\alpha$ , another marker we had found to be expressed by some of our  
302 cultured CAF cells (**Supp. Figs. 4-5**), also revealed more PDGFR- $\alpha$ <sup>+</sup> cells in SVZ areas of  
303 GBM relative to non-SVZ areas of GBM (**Fig. 5E**). In contrast, no staining for PDGFR- $\beta$   
304 or EDA (**Supp. Fig. 18**) and no detectable EDA mRNA above the threshold of accurate  
305 detection by qPCR (**Fig. 5G**) was observed in SVZ samples taken from non-tumor bearing  
306 patient specimens resected during epilepsy cases. Similarly, no staining for PDGFR- $\beta$  or  
307 EDA was noted in SVZ samples taken from the autopsies of GBM patients whose tumors  
308 did not radiographically involve the SVZ (**Fig. 5F**).

309

### 310 *Inclusion of CAFs with GBM stem cells induces tumor growth in vivo*

311 To determine whether the pro-tumoral effects of CAFs on tumor-initiating GSCs  
312 we noted in cultured neurospheres also occurred *in vivo*, we intracranially implanted  
313 40,000 GBM6 neurosphere cells, below the 100,000 neurosphere cell threshold reported

314 to be needed to establish intracranial GBM6 tumors,<sup>36</sup> into 10 athymic mice and 35,000  
315 neurosphere cells mixed with 5,000 CAFs generated from a patient GBM by serial  
316 trypsinization into 10 athymic mice. The inclusion of CAFs with neurospheres enabled  
317 tumor growth to reach endpoint in the majority of mice, which did not occur in the absence  
318 of CAFs (P=0.03; **Fig. 6A**). In fact, addition of CAFs to GBM6 neurospheres caused mice  
319 with 35,000 GBM6 neurosphere cells to reach endpoint with the same time point as mice  
320 with 100,000 GBM6 neurosphere cells and no CAFs (P=0.4; **Supp. Fig. 19**), revealing  
321 that the tumor-promoting effects of CAFs on GSCs we noted in culture were also present  
322 *in vivo* in the intracranial tumor microenvironment. Analysis of these tumors at endpoint  
323 revealed that pro-tumoral effects of GBM CAFs noted in culture were also occurring *in*  
324 *vivo*. Consistent with our findings with cultured GSCs grown in CAF CM, transcriptomic  
325 profiling of tumors derived from GBM6 neurospheres grown alongside CAFs *in vivo*  
326 compared to GBM6 neurospheres grown without CAFs *in vivo* revealed increased  
327 expression of genes involved in HIF-1 signaling pathways, as well as central carbon  
328 metabolism, adherens junctions, and TGF- $\beta$  signaling (P<0.003; **Figs. 6B-D**). IF revealed  
329 that CAFs caused GBM6 neurosphere-derived tumors to exhibit increased vessel  
330 diameter (P<0.001) (**Figs. 6E-F**) but with decreased vessel density (P<0.001) and  
331 decreased total vessel length (P=0.04) (**Supp. Fig. 20**), with the net effect of the former  
332 greater than the latter leading to increased total vessel surface area (P<0.001) (**Figs. 6E-**  
333 **F**). Moreover, flow cytometry analysis revealed that CAFs increased the percentage of  
334 macrophages that were CD206<sup>+</sup> M2 pro-tumoral macrophages in GBM6 neurosphere-  
335 derived tumors (P=0.0096; **Fig. 6G**).

336

## 337 **DISCUSSION**

338 GBMs derive much of their aggressive biology and treatment refractoriness from  
339 their regional tumor microenvironment.<sup>2</sup> Compared to other solid tumors, it is currently  
340 unknown whether CAFs exist in GBM and the role that they play in GBM biology. The  
341 main argument made for a lack of CAFs in GBM is that, apart from a small amount in the  
342 blood vessels, there are no baseline fibroblasts in the brain.<sup>6</sup> However, because of  
343 evidence suggesting that CAFs in other solid tumors arise from marrow-derived  
344 precursors rather than usurping of local normal fibroblasts in the organ where the tumor  
345 forms,<sup>37-40</sup> it seems plausible that CAFs could exist in GBM. Indeed, recent studies have  
346 identified cells expressing markers associated with CAFs in GBM,<sup>7-9</sup> but comprehensive  
347 gene expression profiling to prove these cells were CAFs and evidence for their role in  
348 GBM biology had been lacking, a knowledge gap that our current study addresses.

349 We began the process by determining if serial trypsinization of cells from a primary  
350 GBM specimen, a method that has been shown to generate CAFs in other cancers,<sup>11</sup>  
351 could isolate CAF-like cells. Trypsin detaches cultured cells from the culture dish through  
352 proteolytic effects on cell surface integrins, and serial trypsinization takes advantage of  
353 the fact that primary GBM cells are less adherent and durable than CAFs. Most of these  
354 cells transcriptomically resembled CAFs in single-cell analysis and morphologic analysis  
355 revealed 77% of these cells to be CAFs, similar to the 79% found to be CAFs when the  
356 method was used in a murine lineage tracing study.<sup>11</sup> Interestingly, the cells that emerged  
357 from GBM serial trypsinization did not uniformly express CAF markers, but instead our  
358 cluster analysis suggested possible subtypes of GBM CAFs based on patterns of marker



359 expression. Such subtypes with distinct functionality have been described in CAFs from  
360 other cancers<sup>41</sup> and further work will be needed to determine if that is the case with GBM.

361 Among the unique proteins we found to be expressed by GBM CAFs was the EDA  
362 splice variant of fibronectin. The EDA fibronectin splice variant arises at the 11<sup>th</sup> Type III  
363 repeat (Extra-domain A; EDA). When fibronectin expresses the EDA domain, it is termed  
364 cellular fibronectin and has pivotal roles in wound healing, embryogenesis, and cancer –  
365 hence cellular fibronectin is sometimes referred to as oncofetal fibronectin.<sup>42</sup> EDA  
366 containing fibronectin is thought to be principally produced by fibroblasts, and in  
367 malignancy, cancer associated fibroblasts (CAFs) are commonly the source.<sup>42</sup> In  
368 contrast, fibronectin lacking splice variants is called plasma fibronectin and is produced  
369 by hepatocytes and is not a component of cancer pathogenesis.<sup>42</sup>

370 CAFs in systemic cancers have been shown to render the immune  
371 microenvironment more pro-tumoral by recruiting more monocytes and promoting their  
372 differentiation and polarization into M2 macrophages.<sup>43</sup> We found similar effects of GBM  
373 CAFs, which drove M2 polarization of macrophages via toll-like receptor 4 (TLR4), a  
374 known receptor for the EDA fibronectin that we found to be produced by CAFs.

375 An additional profound effect we found that our novel CAF population exerted on  
376 the GBM microenvironment was on its microvasculature. The pathology of GBM is  
377 characterized by three findings: proliferation of atypical astrocytic neoplastic cells, tumor  
378 cell necrosis, and aberrant microvasculature composed of hypertrophied and glomeruloid  
379 blood vessels.<sup>44</sup> Our finding that CAFs shifted the GBM vasculature to a larger,  
380 hypertrophied phenotype suggests that they play a role in establishing this defining  
381 feature of GBM. The unique architecture of GBM microvasculature has been postulated

382 as one explanation for why GBMs are less responsive to anti-angiogenic therapies like  
383 bevacizumab,<sup>45</sup> and it would be interesting to determine if CAFs play a role in this  
384 resistance by maintaining the unique vascular architecture of GBM.

385 Not only did we find an impact of GBM CAFs on the tumor vasculature, but we  
386 found that these cells were enriched in the perivascular niche in close proximity to blood  
387 vessels. Despite their reduced prevalence, our finding of CAF enrichment in the  
388 perivascular niche positions them to impact GBM biology. The GBM perivascular niche is  
389 defined as the area of the tumor that borders tumor vessels, which has garnered attention  
390 because it is a prime location for the GSCs whose recruitment of and nourishment by  
391 CAFs we demonstrated (**Figure 7**). Localization of CAFs to the perivascular niche  
392 empowers CAFs, despite their relatively low frequency in tumors, to maintain and nourish  
393 GSCs, another rare cell type that also resides in the perivascular niche.

394 We also found regional variation in these CAF-like cells in GBM, with cells  
395 expressing CAF markers being more prevalent in the GBM SVZ. This finding is of interest  
396 because GSCs are not housed uniformly throughout the GBM perivascular niche, but  
397 instead contact the vasculature at sites that lack astrocyte endfeet and pericyte coverage,  
398 a modification of the BBB unique to the SVZ. Interestingly, we found CAF enrichment in  
399 the SVZ of GBM patients but only when the SVZ contained tumor by imaging. Patients  
400 with GBMs that contact the SVZ have an overall survival less than those with tumors  
401 distantly located to SVZ.<sup>46</sup> These differences in survival between SVZ-involved GBMs  
402 have been correlated with proteomic differences<sup>47</sup> which suggest that tumor-initiating  
403 GSC enrichment in the SVZ of SVZ-involved GBMs are responsible for the poor prognosis  
404 of these patients. Our work expands upon these findings by defining the cellular makeup

405 of the SVZ tumor microenvironment and how GSCs could recruit CAFs to the SVZ, as  
406 well as a potential role of CAF enrichment in GBMs in the SVZ in the worsened prognosis  
407 of GBMs involving the SVZ.

408 Another area of uncertainty that we attempted to address is the lineage of this  
409 novel CAF population we identified. While initial studies of CAFs in mouse models of other  
410 cancers have identified CAFs originating from local fibroblasts, endothelial cells, and  
411 vascular mural cells,<sup>48-50</sup> other studies have implicated bone marrow-derived cells, most  
412 likely mesenchymal stem cells, as a source of CAFs.<sup>37-40,51</sup> Our single-cell lineage  
413 analysis suggested that CAFs and pericytes share a lineage and suggested that this  
414 shared lineage is from MSCs. Indeed, pericytes have been shown to derive from PDGFR<sup>+</sup>  
415 myeloid progenitor cells, specifically mesenchymal stem cells (MSCs).<sup>52</sup> MSCs are  
416 multipotent stem cells in bone marrow that make and repair skeletal tissues and co-exist  
417 with hematopoietic stem cells in the marrow that make blood cells. Breakdown of the  
418 blood-brain barrier (BBB) around GBM enables recruitment of endothelial and myeloid  
419 progenitor cells derived from hematopoietic stem cells in the marrow for  
420 neovascularization<sup>53</sup> and establishment of tumor-associated macrophages,<sup>4</sup> respectively.  
421 We hypothesize that BBB breakdown also allows the recruitment of MSCs to GBM which  
422 then differentiate into CAFs and pericytes.

423 There are, of course, some limitations to our work and potential areas of future  
424 study. Our hypotheses about GBM CAF lineage from single cell sequencing data are not  
425 a substitute for the traditional method of lineage tracing that involves genetic labeling of  
426 a cell followed by the tracking of its offspring. Unfortunately, studying GBM CAFs in  
427 mouse models proved challenging because we found that implanted murine GBM models

428 do not produce CAF-like cells during serial trypsinization, suggesting that these cells were  
429 recruited to tumors that naturally formed like human GBM and would best be studied in  
430 transgenic mice that naturally form GBMs, a potential area of future study. The lack of  
431 ubiquitous CAF markers in GBM also made it impossible to quantify this population or  
432 reliably visualize it in tissue, a problem that also arises in other cancers.<sup>54</sup> Further work  
433 will also be needed to develop a reliable protocol for that and to determine if those metrics  
434 can offer prognostic or therapeutic insights for GBM patients, as has been done for CAFs  
435 in other cancers.<sup>55</sup> Overall, our findings provide compelling evidence that GBM CAFs play  
436 a significant role in creating a pro-tumoral GBM microenvironment, insight which we can  
437 now begin to exploit for therapeutic benefit.

438

## 439 **METHODS**

### 440 *Cell Culture*

441 DBTRG-05MG (ATCC), U251 (ATCC), GBM6 (Mayo Clinic), and GBM43 (Mayo Clinic)  
442 GBM cells; HUVEC cells (ATCC); and THP-1 human monocytes (ATCC) were verified  
443 using short tandem repeat (STR) profiling, passaged under 6 times, and confirmed to be  
444 Mycoplasma-free. Breast cancer CAFs were kindly provided by the Breast Cancer Now  
445 Tissue Bank (London, UK). GBM cells were cultured in DMEM/F-12 plus 10% FBS and  
446 1% P/S at 37°C. HUVEC cells were grown in EGM-2 media (Lonza Cat # CC-3162). THP-  
447 1 cells were grown in complete RPMI with HEPES. To isolate and grow GBM CAFs in  
448 culture, the serial trypsinization method<sup>11</sup> was used in which dissociated GBM patient  
449 samples were cultured in DMEM/F12 media with 10% fetal bovine serum and 1%  
450 Penicillin and streptomycin. Cells underwent media change every 4 days and serial

451 trypsinization with 0.25% trypsin-EDTA. Because primary GBM cells are less adherent  
452 than tumor cells, detaching within 30-60 seconds of trypsinization compared to 10-15  
453 minutes for CAFs (as assessed by microscopy), we would trypsinize for 30 seconds and  
454 discard the supernatant which had weakly adherent primary GBM cells, after which we  
455 would trypsinize for 15 minutes to detach the CAFs which were then transferred to a fresh  
456 plate. This serial trypsinization resulted in a cell population with consistent fibroblast  
457 morphology within five weeks. To generate GSC-containing neurospheres, GBM cells  
458 were grown in neurosphere media, consisting of DMEM/F12 (Gibco) supplemented with  
459 20 ng/ml EGF (Peprotech), 20 ng/ml bFGF (Peprotech), and 2% GEM21/neuroplex  
460 (Gemini Bio-Products). When comparing the effects of CAF CM media vs Neurosphere  
461 media, CAF CM was generated by replacing the media of cultured CAF cells by  
462 neurosphere media for 72 hours, after which the media was collected, centrifuged at 300g  
463 for 5 mins followed by filtration through a 40  $\mu$ m filter.

464

#### 465 *Human GBM Tissue Acquisition*

466 Site-directed biopsies were guided via BrainLab™ interoperative MRI with IRB approval  
467 (approval #11-06160). Biopsy locations were confirmed by image capture at the time of  
468 biopsy. Samples were then transported while suspended in standard culture media on ice  
469 to the laboratory for processing. The regions were: (1) tumor core, the center of the tumor;  
470 (2) tumor leading edge, the outer edge of the tumor enhancement as seen on MRI; and  
471 (3) peri-tumoral brain zone (PBZ); the FLAIR bright region outside gadolinium  
472 enhancement on MRI.<sup>34</sup> Samples were also obtained from the SVZ region when GBM

473 tumors invaded this area. Additional SVZ samples were obtained as non-tumor controls  
474 from (1) patients undergoing surgical correction of epilepsy and (2) non-tumor autopsies.

475

#### 476 *Sample Dissociation*

477 In order to separate cells from the surrounding stroma, samples were placed on sterile  
478 culture plates and finely chopped with sterile scalpels. Tumor chunks were suspended in  
479 papain at 37°C for 30 minutes and vortexed to assure good mixture. After this incubation,  
480 the solution was applied to a 50  $\mu$ m filter and rinsed with culture media. Cells were then  
481 centrifuged for 5 minutes at 500 g. Media was aspirated, and cells were treated with 1 ml  
482 of ACK RBC Lysis Buffer (Lonza) for 2 minutes. The RBC lysis reaction was halted by  
483 addition of 5 mL dPBS. Remaining cells were centrifuged for 5 minutes at 500 g, ACK  
484 lysis buffer/dPBS was aspirated, and cells were resuspended in fresh dPBS and counted.

485

#### 486 *Morphology Analysis*

487 15,000 cells/well were seeded in Permanox 2-chamber slides (Sigma #C6682). Cells  
488 were incubated overnight at 37°C, followed by staining with CytoTracker Green  
489 (ThermoFisher Scientific #C2925) supplemented media for 30 minutes, and then fixed  
490 using 4% paraformaldehyde solution in PBS (Thermo #J19943-K2). Cells were imaged  
491 at 20x on a Zeiss Cell Observer Spinning Disc Confocal microscope using ZEN Blue 2012  
492 (Carl Zeiss) software. Images were segmented into their blue and green channels for  
493 DAPI and CellTrackerGreen staining using ImageJ. CellProfiler was used to identify  
494 nuclei as primary objects, and cytoplasm as secondary objects. Propagation and  
495 watershed methods were used, with thresholds manually adjusted and verified.

496 Morphology analysis was done with the VAMPIRE analysis package<sup>56</sup> with 100  
497 coordinates and 100 shape modes as the settings and corresponding data was fed into  
498 our logistic regression. Data was compiled through four biological repeats, and statistical  
499 testing was done with an unpaired t-test by randomly splitting our total data set into three  
500 to check for consistent outcomes in each subpopulation. These splitting functions were  
501 also adjusted to test after normalizing for sample size and remained significant. These  
502 segmented nuclei and cytoplasm were then fed separately into the VAMPIRE pipeline to  
503 calculate their respective unique morphological features such as circularity. By pairing the  
504 nuclei and cytoplasm datasets by cell, we generated a 16 data-point profile for each cell.  
505 We then designed a machine learning logistic regression classifier utilizing breast cancer  
506 CAF data and GBM data from GBM6, GBM43 and U251 to achieve nominal accuracy of  
507 91% using a 70%/30% train/test split of approximately 2704 cellular images.

508

#### 509 *Neurosphere formation assay*

510 To determine the effect of CAF CM on neurospheres, 10,000 GBM6 cells expressing  
511 luciferase were seeded in triplicate in a 12-well low attachment plate with either  
512 neurosphere media or CAF CM. We then assessed bioluminescence after 72 hours and  
513 imaged at 72 hours under 100x magnification using a Nikon D90 mounted on a Nikon  
514 Eclipse TS100 microscope, with 15 high power fields (hpf) from each condition analyzed  
515 using ImageJ. ROI manager function was used to measure the total area of neurospheres  
516 which accounted for the total number of spheres and sphere diameter.

517

#### 518 *Nanostring Multiplex Transcriptomic Analysis*

519 Using the RNeasy Mini kit (Qiagen), RNA was extracted from GBM6 neurospheres grown  
520 in neurosphere media or CAF CM and GBM6 xenografts grown with or without CAFs. A  
521 bioanalyzer was used to determine quantity and quality of the RNA sample. RNA (175  
522 ng) from each sample was hybridized with the codeset for 18 hours. 30  $\mu$ l of the reaction  
523 was loaded into the nCounter cartridge and run on the nCounter SPRINT Profiler. The  
524 raw data was then extracted followed by quality control and alignment using the  
525 Nanostring analysis software. Raw files were further processed and analyzed using the  
526 DESeq2 package in R to reveal differentially expressed genes.

527

#### 528 *Cell proliferation assay*

529 GBM CAFs were plated at 1000 cells per well in 96 well plates in neurosphere media or  
530 GSC CM. Proliferation was continuously assessed using the xCELLigence RTCA MP  
531 instrument (ACEA Biosciences) to measure impedance as a surrogate for cell count over  
532 120 hours.<sup>57</sup> First, 50  $\mu$ L of media was added to each well of 96 well E-Plates (ACEA  
533 Biosciences) and the background impedance was measured and displayed as Cell Index.  
534 Dissociated adherent GBM CAF cells were seeded at 1000, 3000, 5000, or 7000  
535 cells/well of the E-Plate in a volume of 100  $\mu$ L and allowed to passively adhere on the  
536 electrode surface. Post seeding, the E-Plate was kept at ambient temperature inside a  
537 laminar flow hood for 30 minutes and then transferred to the RTCA MP instrument inside  
538 a cell culture incubator. Data recording was initiated immediately at 15-minute intervals  
539 for the entire duration of the experiment.

540

#### 541 *RNA Extraction*



542 RNA was extracted using the RNeasy™ products supplied by Qiagen. This protocol was  
543 either applied to whole *ex vivo* samples or to dissociated cells as required by the  
544 experiment. Extracted RNA was stored at -80°C.

545

#### 546 *Bulk RNA Sequencing*

547 GBM CAF RNA libraries were prepared and Illumina HiSeq NGS performed (UC Davis  
548 DNA Technologies Core, Davis, CA) per standard protocols. GBM CAF RNA-Seq  
549 datasets were aligned (BowTie2) and gene exons counted (FeatureCounts) with standard  
550 inputs using the Galaxy public server (<https://usegalaxy.org/>). iPSC-Pericyte  
551 (GSE117469 and GSM2790558),<sup>15</sup> dermal fibroblast (GSM3124683),<sup>16</sup> and breast  
552 cancer CAF (GSE106503)<sup>14</sup> RNA-seq results were obtained from GEO and RNA-seq  
553 results from seven different types of normal human fibroblasts were kindly provided by  
554 Susan Thibeault (University of Wisconsin).<sup>17</sup> Differential gene expression, heatmap, and  
555 sample cluster were performed by iDEP8.1 (<http://bioinformatics.sdstate.edu/idep/>). To  
556 infer the receptor-ligand interactions between GBM CAFs and GBM6 neurospheres, we  
557 compared the RNA-seq data we generated from a pair of GBM CAFs and published RNA-  
558 Seq from GBM6 neurospheres<sup>27</sup> to a database of 491 known receptor-ligand  
559 interactions.<sup>58</sup> Then we annotated cognate pairs that were co-expressed by GBM CAFs  
560 and GSCs for which the number of FPKM of the ligand is > 0.05 and read counts of the  
561 receptor is > 10. This produced 189 GSC ligands with receptors expressed by CAFs and  
562 174 CAF ligands with receptors expressed by GSCs for further analysis.

563

#### 564 *Single-cell RNA-Sequencing*

565 Single-cell sequencing was carried out using the chromium Next GEM Single Cell 3'v3.1  
566 protocol (10x genomics). Fresh tumor tissue post resection was collected in the  
567 Hiberbate™ media and dissociated with an enzyme cocktail including 32 mg of  
568 Collagenase IV (Worthington #LS0042019); 10 mg of Deoxyribonuclease I (Worthington  
569 #LS002007) and 20 mg Soybean trypsin inhibitor (Worthington #LS003587) in 10 ml  
570 DPBS followed by RBC lysis to form a single cell suspension which was then serially  
571 trypsinized to generate CAFs. CAFs were used for library preparation for single-cell  
572 sequencing using the manufacturers protocol. Post library preparation cells were  
573 sequenced using the Illumina Novaseq. Raw data was preprocessed using Cell Ranger  
574 to obtain the matrix and count files. Data analysis was carried out using the Seurat  
575 algorithm on R. Single-cell RNA-Seq publicly available data from 8 GBM patients GBMs  
576 <sup>19</sup> was downloaded from the Broad institute database. The data was analyzed in R using  
577 scRNA-seq Seurat 10x genomics workflow. Low-quality/dying cells which often express  
578 high mitochondrial contamination were filtered by PercentageFeatureSet function. Cell  
579 doublets or cells expressing aberrantly high gene counts were filtered out. Data was  
580 normalized using LogNormalize, a global-scaling normalization method. We next  
581 calculated the highly variable genes followed by scaling the data using the ScaleData  
582 function. Next, we calculated the PCA to explore the heterogeneity within the dataset. We  
583 then clustered the cells using FindClusters function which applies modularity optimization  
584 techniques. We carried out non-linear dimensional reduction technique to generate  
585 UMAPs to visualize these datasets. FindMarkers function was used to identify makers of  
586 clustered cells. Lineage specificity analysis was done using the slingshot algorithm  
587 [https://bustools.github.io/BUS\\_notebooks\\_R/slinsshot.html](https://bustools.github.io/BUS_notebooks_R/slinsshot.html).

588

589 *Quantitative Polymerase Chain Reactions*

590 cDNA was created using qScript XLT cDNA Supermix (Quanta Bio), both following  
591 standard manufacturer's protocol. cDNA was diluted to a constant concentration for all  
592 samples to ensure similar nucleic acid loading levels. Quantitative PCR was carried out  
593 using Power Syber Green Master Mix (Applied Biosystems) and primers described in  
594 **Supp. Table 4**. qPCR was performed on an Applied Biosystems StepOne Real-Time  
595 PCR cycler following recommended guidelines described by Applied Biosystems for  
596 Syber: 95° C for 10 min, followed by 40 cycles of 95° C for 15 sec and 60° C for 1 min. Ct  
597 values were calculated using the StepOne software accompanying the real-time cycler.  
598 Samples were prepared with three technical replicates for each primer pair.

599

600 *Immunofluorescence*

601 Tissue from the operating room or from mouse tumors was promptly suspended in 4%  
602 paraformaldehyde in water for two hours. These samples were then transferred to a 30%  
603 sucrose solution for 20 hours. Samples were then submerged into Tissue-Plus Optimal  
604 Cooling Temperature (OCT) Compound TM (Fisher Scientific) and frozen at -80°C for 24  
605 hours. The OCT tissue blocks were then sectioned into 10 µm thick slices using a Leica  
606 HM550 Cryostat. Slides were rinsed with acetone and phosphate buffered saline (PBS)  
607 solution. 5% blocking solution (TNB) was made by mixing blocking solution with tris  
608 buffered saline (TBS). Slides were coated in blocking solution for 2 hours followed by  
609 primary antibodies in TNB for 12 hours at 4°C. Slides were rinsed with PBS and then  
610 secondary antibody (in blocking solution) was applied for 2 hours. The solution was

611 aspirated and the sample was allowed to dry before 4,6-diamidino-2-phenylindole (DAPI)  
612 was added and the coverslip was applied. Samples were kept in the dark before  
613 visualizing with a Zeiss M1 fluorescent microscope. Images were processed using Fiji's  
614 ImageJ software. Antibodies used are in **Supp. Table 5**.

615

#### 616 *Flow Cytometry and Fluorescence-Activated Cell Sorting (FACS)*

617 Samples were prepared via manual mechanical separation and papain digestion. RBC  
618 lysis was performed. Samples were resuspended in DMEM, pelleted, and resuspended  
619 in FACS buffer with Fc-block (Human Seroblock, Bio-Rad). These samples were then re-  
620 pelleted and suspended in a cocktail of fluorophore-conjugated primary antibodies (**Supp.**  
621 **Table 5**). After incubation at 4 degrees, the samples were rinsed 3 times in FACS buffer  
622 and then suspended in FACS buffer for analysis and sorting with FACSARIA III (BD  
623 Biosciences). Living single cells were selected via FSC/SSC isolation.

624

#### 625 *Invasion Assays*

626 All invasion assays were completed using the Matrigel™ (Corning, New York) matrix  
627 solution. Matrigel was placed on Boyden chamber membranes per the manufactures  
628 protocol. The test media was placed at the bottom of the Boyden chambers and invading  
629 cells were placed on the other surface. After 24 hours, non-invading cells were washed  
630 away, and invasion was quantified via DAPI staining. Invasion was reported as number  
631 of cells per high-power field (hpf; 40x magnification).

632

#### 633 *Population-based Bioinformatics*

634 Population-based bioinformatic data was obtained from Gliovis ([gliovis.bioinfo.cnio.es](http://gliovis.bioinfo.cnio.es)),  
635 a composite database that collects genetic information from multiple repositories. We  
636 used the U133A array from the TCGA\_GBM dataset. Statistics performed on these  
637 analyses were done using the Gliovis statistical tools.

638

### 639 *Angiogenesis Assay in Culture*

640 Geltrex™ LDEV-Free Reduced Growth Factor Basement Membrane Matrix  
641 (ThermoFisher Cat # A1413202) was thawed overnight at 4°C. 120 µL of pure Geltrex  
642 was plated into 48-well tissue culture treated plates (Corning #353078), with plates  
643 tapped to spread the Geltrex, and incubated at 37°C for 30 minutes. 40,000 HUVEC cells  
644 in EGM-2 with hydrocortisone, ascorbic acid, GA-1000, and heparin but without growth  
645 factors (bFGF-B, VEGF, R3-IGF-1, bEGF and bovine brain extract) were then added to  
646 each well. 100 µL of each condition of media was then added to each well. Plate was  
647 tilted in all directions to distribute cells. After 3 hours and 30 minutes, an additional 100  
648 µL of EGM-2 without growth factor was added with 1.5 µL of 1 mg/mL calcein-am  
649 (ThermoFisher Cat # C1430). Cells were then imaged 30 minutes later at the 4-hour  
650 timepoint, and at 8, 16, and 24 hour timepoints. Cells were imaged at 2.5x on a Zeiss Cell  
651 Observer Spinning Disc Confocal microscope using ZEN Blue 2012 (Carl Zeiss) software,  
652 with full z-stacks and stitching used to capture the entire well in 3-dimensional space.

653

### 654 *Quantifying Angiogenesis in HUVEC culture assays and in vivo*

655 Images were processed to produce a Max Intensity Z-projection that was then analyzed  
656 using the ImageJ Angiogenesis Analyzer package, available at

657 [http://image.bio.methods.free.fr/ImageJ/?Angiogenesis-Analyzer-for-](http://image.bio.methods.free.fr/ImageJ/?Angiogenesis-Analyzer-for-ImageJ&lang=en#outil_sommaire_0)  
658 [ImageJ&lang=en#outil\\_sommaire\\_0](http://image.bio.methods.free.fr/ImageJ/?Angiogenesis-Analyzer-for-ImageJ&lang=en#outil_sommaire_0). Default software settings were used with the  
659 exception of not suppressing isolated elements. For cell culture assays, we normalized  
660 and averaged expansion (Nb extrem. /Nb branches / Tot. branches length), extension  
661 (Tot. master segments length / Tot. length / Tot. branching length / Tot. segments length),  
662 and fusion (Nb Junctions / Nb master junction / Nb master segments / Nb meshes / Nb  
663 pieces / Nb segment) metrics. Composite figures were compiled based on all possible  
664 individual metrics that describe the biological phenomenon in order to avoid bias. Each  
665 datapoint was normalized to control and then compared using a paired t-test in the  
666 composite statistical test. For *in vivo* assessment, total vessel length was derived from  
667 the software and converted to microns from pixel values using scale bar calculations.

668

### 669 *Macrophage Studies*

670 THP-1 cells and monocytes isolated from peripheral blood (AllCells) run through the  
671 MojoSort™ Human CD14 Selection Kit were treated with 50 ng/μL PMA (phorbol  
672 myristate acetate) for 4 days to allow cell adhesion to the plate and differentiation into  
673 resting M0 macrophages. Resulting M0 macrophages were then incubated with 20 ng/mL  
674 IFN-γ (for M1 polarization), 20 ng/mL IL-4 (for M2 polarization), or experimental  
675 conditions. Cells then underwent qPCR analysis of expression of three M1 (*NOS2*,  
676 *CXCL10*, and *IL1B*) and three M2 genes (*ARG1*, *TGFB1*, and *MMP9*), from which we  
677 derived an M2/M1 ratio of the expression of the three M2 markers divided by expression  
678 of the three M1 markers as we previously described.<sup>33</sup> To assess macrophage

679 proliferation, cells were plated into black 96-well clear bottom plates and analyzed using  
680 CyQuant cell proliferation assay kits (Thermo Scientific, c7026).

681  
682 *Murine Intracranial Xenograft Tumors*  
683 Animal experiments were approved by the UCSF IACUC (approval #AN105170-02). Cells  
684 (either 40,000 or 100,000 GBM6 cells grown as neurospheres or 35,000 GBM6 cells  
685 grown as neurospheres mixed with 5,000 GBM CAFs) were implanted intracranially into  
686 the right frontal lobes of athymic mice (6-8 weeks, female) stereotactically.

687  
688 *Statistics*  
689 Quantitative PCRs, invasion assays, cell proliferation assays, neurosphere formation  
690 assays were done with three technical and biological replicates. P-values were generated  
691 using the non-parametric two-tailed T-test to compare effects between two conditions.  
692 NanoString raw data was analyzed using the DESeq2 package in R. The DESeq2  
693 package carries out an internal normalization where a geometric mean is calculated for  
694 each gene across replicates, the counts for a gene in each replicate is then divided by  
695 the mean. Count outliers were removed using Cook's distance analysis. The Wald test is  
696 used for testing significance. Kaplan-Meier analysis was carried out for survival studies.  
697 Single-cell RNAseq analysis was carried out using the standard Seurat workflow.

698  
699 *Data availability*  
700 The custom script used for our cell morphology analysis has been made available at  
701 [https://github.com/alexanderchang1/GBM\\_CAF\\_open](https://github.com/alexanderchang1/GBM_CAF_open). Sequencing data that support the

702 findings of this study have been deposited in the National Center for Biotechnology  
703 Information Gene Expression Omnibus (GEO) and are accessible through the GEO  
704 Series accession number [GSE132825](#). All other relevant data are available from the  
705 corresponding author on request.

706

#### 707 **CONFLICT OF INTEREST**

708 The authors report no competing financial interests in relation to the work described.

709

#### 710 **ACKNOWLEDGEMENTS**

711 M.K.A. was supported by the NIH (1R01CA227136 and 2R01NS079697) and the Uncle  
712 Kory Foundation. J.R., A.C., and S.S. were supported by Howard Hughes Medical  
713 Institute (HHMI) fellowships. A.C. was supported by Alpha Omega Alpha (AOA) Carolyn  
714 L. Kuckein Student Research Fellowship. J.R. was supported by UCSF School of  
715 Medicine (SOM) Pathways Explore Summer Grants. This study was supported in part by  
716 HDFCCC Laboratory for Cell Analysis Shared Resource Facility through grants from NIH  
717 (P30CA082103 and S10 OD021818-01).

718



714 **REFERENCES**

- 715 1 Stupp, R., Lukas, R. V. & Hegi, M. E. Improving survival in molecularly selected  
716 glioblastoma. *Lancet* **393**, 615-617, doi:10.1016/S0140-6736(18)33211-2 (2019).
- 717 2 Quail, D. F. & Joyce, J. A. The Microenvironmental Landscape of Brain Tumors.  
718 *Cancer Cell* **31**, 326-341, doi:10.1016/j.ccell.2017.02.009 (2017).
- 719 3 Huang, M. *et al.* Wnt-mediated endothelial transformation into mesenchymal  
720 stem cell-like cells induces chemoresistance in glioblastoma. *Sci Transl Med* **12**,  
721 doi:10.1126/scitranslmed.aay7522 (2020).
- 722 4 Muller, S. *et al.* Single-cell profiling of human gliomas reveals macrophage  
723 ontogeny as a basis for regional differences in macrophage activation in the  
724 tumor microenvironment. *Genome Biol* **18**, 234, doi:10.1186/s13059-017-1362-4  
725 (2017).
- 726 5 Bhowmick, N. A., Neilson, E. G. & Moses, H. L. Stromal fibroblasts in cancer  
727 initiation and progression. *Nature* **432**, 332-337, doi:10.1038/nature03096 (2004).
- 728 6 LeBleu, V. S. & Neilson, E. G. Origin and functional heterogeneity of fibroblasts.  
729 *FASEB J* **34**, 3519-3536, doi:10.1096/fj.201903188R (2020).
- 730 7 Clavreul, A. *et al.* Isolation of a new cell population in the glioblastoma  
731 microenvironment. *J Neurooncol* **106**, 493-504, doi:10.1007/s11060-011-0701-7  
732 (2012).
- 733 8 Clavreul, A. *et al.* Glioblastoma-associated stromal cells (GASCs) from  
734 histologically normal surgical margins have a myofibroblast phenotype and  
735 angiogenic properties. *J Pathol* **233**, 74-88, doi:10.1002/path.4332 (2014).
- 736 9 Trylcova, J. *et al.* Effect of cancer-associated fibroblasts on the migration of  
737 glioma cells in vitro. *Tumour Biol* **36**, 5873-5879, doi:10.1007/s13277-015-3259-8  
738 (2015).
- 739 10 Hosaka, K. *et al.* Pericyte-fibroblast transition promotes tumor growth and  
740 metastasis. *Proc Natl Acad Sci U S A* **113**, E5618-5627,  
741 doi:10.1073/pnas.1608384113 (2016).
- 742 11 McDonald, L. T. *et al.* Hematopoietic stem cell-derived cancer-associated  
743 fibroblasts are novel contributors to the pro-tumorigenic microenvironment.  
744 *Neoplasia* **17**, 434-448, doi:10.1016/j.neo.2015.04.004 (2015).
- 745 12 De Wever, O., Demetter, P., Mareel, M. & Bracke, M. Stromal myofibroblasts are  
746 drivers of invasive cancer growth. *Int J Cancer* **123**, 2229-2238,  
747 doi:10.1002/ijc.23925 (2008).
- 748 13 Wu, P.-H. *et al.* Evolution of cellular morpho-phenotypes in cancer metastasis.  
749 *Scientific Reports* **5**, 18437, doi:10.1038/srep18437 (2015).
- 750 14 Yan, W. *et al.* Cancer-cell-secreted exosomal miR-105 promotes tumour growth  
751 through the MYC-dependent metabolic reprogramming of stromal cells. *Nat Cell*  
752 *Biol* **20**, 597-609, doi:10.1038/s41556-018-0083-6 (2018).
- 753 15 Wimmer, R. A. *et al.* Human blood vessel organoids as a model of diabetic  
754 vasculopathy. *Nature* **565**, 505-510, doi:10.1038/s41586-018-0858-8 (2019).
- 755 16 Fleischer, J. G. *et al.* Predicting age from the transcriptome of human dermal  
756 fibroblasts. *Genome Biol* **19**, 221, doi:10.1186/s13059-018-1599-6 (2018).

- 757 17 Foote, A. G., Wang, Z., Kendzioriski, C. & Thibeault, S. L. Tissue specific human  
758 fibroblast differential expression based on RNAsequencing analysis. *BMC*  
759 *Genomics* **20**, 308, doi:10.1186/s12864-019-5682-5 (2019).
- 760 18 Nishishita, R. *et al.* Expression of cancer-associated fibroblast markers in  
761 advanced colorectal cancer. *Oncol Lett* **15**, 6195-6202, doi:10.3892/ol.2018.8097  
762 (2018).
- 763 19 Neftel, C. *et al.* An Integrative Model of Cellular States, Plasticity, and Genetics  
764 for Glioblastoma. *Cell* **178**, 835-849 e821, doi:10.1016/j.cell.2019.06.024 (2019).
- 765 20 Kumar, A. *et al.* Specification and Diversification of Pericytes and Smooth Muscle  
766 Cells from Mesenchymoangioblasts. *Cell Rep* **19**, 1902-1916,  
767 doi:10.1016/j.celrep.2017.05.019 (2017).
- 768 21 Street, K. *et al.* Slingshot: cell lineage and pseudotime inference for single-cell  
769 transcriptomics. *BMC Genomics* **19**, 477, doi:10.1186/s12864-018-4772-0  
770 (2018).
- 771 22 Saelens, W., Cannoodt, R., Todorov, H. & Saeyns, Y. A comparison of single-cell  
772 trajectory inference methods. *Nat Biotechnol* **37**, 547-554, doi:10.1038/s41587-  
773 019-0071-9 (2019).
- 774 23 Roson-Burgo, B., Sanchez-Guijo, F., Del Canizo, C. & De Las Rivas, J. Insights  
775 into the human mesenchymal stromal/stem cell identity through integrative  
776 transcriptomic profiling. *BMC Genomics* **17**, 944, doi:10.1186/s12864-016-3230-0  
777 (2016).
- 778 24 Heroux, M. S. *et al.* Comprehensive characterization of glioblastoma tumor  
779 tissues for biomarker identification using mass spectrometry-based label-free  
780 quantitative proteomics. *Physiol Genomics* **46**, 467-481,  
781 doi:10.1152/physiolgenomics.00034.2014 (2014).
- 782 25 Verhaak, R. G. *et al.* Integrated genomic analysis identifies clinically relevant  
783 subtypes of glioblastoma characterized by abnormalities in PDGFRA, IDH1,  
784 EGFR, and NF1. *Cancer Cell* **17**, 98-110, doi:10.1016/j.ccr.2009.12.020 (2010).
- 785 26 Calabrese, C. *et al.* A perivascular niche for brain tumor stem cells. *Cancer Cell*  
786 **11**, 69-82, doi:10.1016/j.ccr.2006.11.020 (2007).
- 787 27 Zhou, D. *et al.* Distinctive epigenomes characterize glioma stem cells and their  
788 response to differentiation cues. *Genome Biol* **19**, 43, doi:10.1186/s13059-018-  
789 1420-6 (2018).
- 790 28 Aoto, K., Ito, K. & Aoki, S. Complex formation between platelet-derived growth  
791 factor receptor beta and transforming growth factor beta receptor regulates the  
792 differentiation of mesenchymal stem cells into cancer-associated fibroblasts.  
793 *Oncotarget* **9**, 34090-34102, doi:10.18632/oncotarget.26124 (2018).
- 794 29 Jahangiri, A. *et al.* Cross-activating c-Met/beta1 integrin complex drives  
795 metastasis and invasive resistance in cancer. *Proc Natl Acad Sci U S A* **114**,  
796 E8685-E8694, doi:10.1073/pnas.1701821114 (2017).
- 797 30 Betz, C., Lenard, A., Belting, H. G. & Affolter, M. Cell behaviors and dynamics  
798 during angiogenesis. *Development* **143**, 2249-2260, doi:10.1242/dev.135616  
799 (2016).
- 800 31 Badie, B. & Schartner, J. Role of microglia in glioma biology. *Microscopy*  
801 *Research and Technique* **54**, 106-113, doi:10.1002/jemt.1125 (2001).

- 802 32 Okamura, Y. *et al.* The extra domain A of fibronectin activates Toll-like receptor  
803 4. *J Biol Chem* **276**, 10229-10233, doi:10.1074/jbc.M100099200 (2001).
- 804 33 Castro, B. A. *et al.* Macrophage migration inhibitory factor downregulation: a  
805 novel mechanism of resistance to anti-angiogenic therapy. *Oncogene* **36**, 3749-  
806 3759, doi:10.1038/onc.2017.1 (2017).
- 807 34 Lemee, J. M., Clavreul, A. & Menei, P. Intratumoral heterogeneity in  
808 glioblastoma: don't forget the peritumoral brain zone. *Neuro Oncol* **17**, 1322-  
809 1332, doi:10.1093/neuonc/nov119 (2015).
- 810 35 Lee, J. H. *et al.* Human glioblastoma arises from subventricular zone cells with  
811 low-level driver mutations. *Nature* **560**, 243-247, doi:10.1038/s41586-018-0389-3  
812 (2018).
- 813 36 Teplyuk, N. M. *et al.* Therapeutic potential of targeting microRNA-10b in  
814 established intracranial glioblastoma: first steps toward the clinic. *EMBO Mol*  
815 *Med* **8**, 268-287, doi:10.15252/emmm.201505495 (2016).
- 816 37 Direkze, N. C. *et al.* Bone marrow contribution to tumor-associated  
817 myofibroblasts and fibroblasts. *Cancer Res* **64**, 8492-8495, doi:10.1158/0008-  
818 5472.CAN-04-1708 (2004).
- 819 38 Jung, Y. *et al.* Recruitment of mesenchymal stem cells into prostate tumours  
820 promotes metastasis. *Nat Commun* **4**, 1795, doi:10.1038/ncomms2766 (2013).
- 821 39 Mishra, P. J. *et al.* Carcinoma-associated fibroblast-like differentiation of human  
822 mesenchymal stem cells. *Cancer Res* **68**, 4331-4339, doi:10.1158/0008-  
823 5472.CAN-08-0943 (2008).
- 824 40 Quante, M. *et al.* Bone marrow-derived myofibroblasts contribute to the  
825 mesenchymal stem cell niche and promote tumor growth. *Cancer Cell* **19**, 257-  
826 272, doi:10.1016/j.ccr.2011.01.020 (2011).
- 827 41 Costa, A. *et al.* Fibroblast Heterogeneity and Immunosuppressive Environment in  
828 Human Breast Cancer. *Cancer Cell* **33**, 463-479 e410,  
829 doi:10.1016/j.ccell.2018.01.011 (2018).
- 830 42 Rick, J. W. *et al.* Fibronectin in malignancy: Cancer-specific alterations,  
831 protumoral effects, and therapeutic implications. *Semin Oncol* **46**, 284-290,  
832 doi:10.1053/j.seminoncol.2019.08.002 (2019).
- 833 43 Zhang, R. *et al.* Cancer-associated fibroblasts enhance tumor-associated  
834 macrophages enrichment and suppress NK cells function in colorectal cancer.  
835 *Cell Death Dis* **10**, 273, doi:10.1038/s41419-019-1435-2 (2019).
- 836 44 Mustafa, D. *et al.* Structural and expression differences between the vasculature  
837 of pilocytic astrocytomas and glioblastomas. *J Neuropathol Exp Neurol* **72**, 1171-  
838 1181, doi:10.1097/NEN.000000000000015 (2013).
- 839 45 Flanigan, P. M. & Aghi, M. K. Adaptation to antiangiogenic therapy in  
840 neurological tumors. *Cell Mol Life Sci* **72**, 3069-3082, doi:10.1007/s00018-015-  
841 1916-0 (2015).
- 842 46 Adeberg, S. *et al.* A comparison of long-term survivors and short-term survivors  
843 with glioblastoma, subventricular zone involvement: a predictive factor for  
844 survival? *Radiat Oncol* **9**, 95, doi:10.1186/1748-717X-9-95 (2014).
- 845 47 Gollapalli, K. *et al.* Subventricular zone involvement in Glioblastoma - A  
846 proteomic evaluation and clinicoradiological correlation. *Sci Rep* **7**, 1449,  
847 doi:10.1038/s41598-017-01202-8 (2017).

- 848 48 Kalluri, R. The biology and function of fibroblasts in cancer. *Nat Rev Cancer* **16**,  
849 582-598, doi:10.1038/nrc.2016.73 (2016).
- 850 49 Shi, Y., Du, L., Lin, L. & Wang, Y. Tumour-associated mesenchymal  
851 stem/stromal cells: emerging therapeutic targets. *Nat Rev Drug Discov* **16**, 35-52,  
852 doi:10.1038/nrd.2016.193 (2017).
- 853 50 Worthley, D. L. *et al.* Bone marrow cells as precursors of the tumor stroma. *Exp*  
854 *Cell Res* **319**, 1650-1656, doi:10.1016/j.yexcr.2013.03.006 (2013).
- 855 51 Arena, S., Salati, M., Sorgentoni, G., Barbisan, F. & Orciani, M. Characterization  
856 of tumor-derived mesenchymal stem cells potentially differentiating into cancer-  
857 associated fibroblasts in lung cancer. *Clin Transl Oncol* **20**, 1582-1591,  
858 doi:10.1007/s12094-018-1894-4 (2018).
- 859 52 de Souza, L. E., Malta, T. M., Kashima Haddad, S. & Covas, D. T. Mesenchymal  
860 Stem Cells and Pericytes: To What Extent Are They Related? *Stem Cells Dev*  
861 **25**, 1843-1852, doi:10.1089/scd.2016.0109 (2016).
- 862 53 Aghi, M., Cohen, K. S., Klein, R. J., Scadden, D. T. & Chiocca, E. A. Tumor  
863 stromal-derived factor-1 recruits vascular progenitors to mitotic neovasculature,  
864 where microenvironment influences their differentiated phenotypes. *Cancer Res*  
865 **66**, 9054-9064, doi:10.1158/0008-5472.CAN-05-3759 (2006).
- 866 54 Sharon, Y., Alon, L., Glanz, S., Servais, C. & Erez, N. Isolation of normal and  
867 cancer-associated fibroblasts from fresh tissues by Fluorescence Activated Cell  
868 Sorting (FACS). *J Vis Exp*, e4425, doi:10.3791/4425 (2013).
- 869 55 Sahai, E. *et al.* A framework for advancing our understanding of cancer-  
870 associated fibroblasts. *Nat Rev Cancer* **20**, 174-186, doi:10.1038/s41568-019-  
871 0238-1 (2020).
- 872 56 Wu, P. H. *et al.* Evolution of cellular morpho-phenotypes in cancer metastasis.  
873 *Sci Rep* **5**, 18437, doi:10.1038/srep18437 (2015).
- 874 57 Ke, N., Wang, X., Xu, X. & Abassi, Y. A. The xCELLigence system for real-time  
875 and label-free monitoring of cell viability. *Methods Mol Biol* **740**, 33-43,  
876 doi:10.1007/978-1-61779-108-6\_6 (2011).
- 877 58 Graeber, T. G. & Eisenberg, D. Bioinformatic identification of potential autocrine  
878 signaling loops in cancers from gene expression profiles. *Nat Genet* **29**, 295-300,  
879 doi:10.1038/ng755 (2001).
- 880

882 **FIGURES**

883

884 **Figure 1. Identification of CAFs in GBM. (A)** Representative segmented images of  
885 patient derived GBM cells with and without serial trypsinization. **(B)** Quantification of  
886 VAMPIRE analysis, revealing that nearly 77% of cells isolated from serial trypsinization  
887 of GBM exhibited fibroblast morphology, defined using 1997T and 2124T breast cancer-  
888 associated fibroblasts, compared to just 23% of these cells exhibiting GBM morphology,  
889 defined using GBM6, GBM43 and U251 cells ( $P < 0.001$ ). **(C)** Serially trypsinized cells from  
890 patient GBMs exhibited a transcriptomic profile similar to breast cancer CAFs and normal  
891 human dermal fibroblasts but distinct from brain pericytes as assessed by bulk RNA-seq.  
892 **(D)** Heterogeneous expression of markers expressed by CAFs from other cancers among  
893 9 clusters identified by scRNA-seq of 7,276 serially trypsinized cells from patient GBM;  
894 and **(E)** Violin plots showing expression of three CAF markers in these clusters. **(F)**  
895 Neighbor clustering and a non-dimensional reduction technique UMAP were used to  
896 identify and visualize 18 robust cell clusters based on the 23386 most variable genes  
897 across scRNA-seq of 12074 cells from 8 patient GBMs. Shown are violin plots for  
898 expression of CAF marker MCAM and pericyte marker PDGFRL, along with results of a  
899 slingshot lineage trajectory analysis performed on the 18 clusters. **(G)** qPCR revealed  
900 elevated expression of total fibronectin and the EDA splice variant of fibronectin in CAF-  
901 like cells isolated by serial trypsinization of patient GBMs relative to (1) CD11b<sup>+</sup> TAMs  
902 and (2) a population enriched for tumor cells obtained by flow sorting a freshly resected  
903 tumor to eliminate stromal cells expressing CD11b, CD31, and CD3 (n=3/group). **(H)** EDA  
904 fibronectin expression correlated with aggregate expression of five mesenchymal genes

905 **(Supp. Table 6)** as assessed by qPCR of patient newly diagnosed GBM specimens (n=8;  
906 P=0.0012). **(I)** IF of patient GBMs revealed PDGFR- $\beta$  staining in close proximity to EDA  
907 staining (left panel: red=EDA; green=PDGFR- $\beta$ ), with PDGFR- $\beta$ <sup>+</sup> cells also in comparable  
908 proximity to CD31<sup>+</sup> vessels (middle panel: red=CD31; green=PDGFR- $\beta$ ) as Nestin<sup>+</sup> GSCs  
909 (right panel: red=CD31; green=nestin), as confirmed by bar graph on the right  
910 (P=0.3=NS=not significant), with some PDGFR- $\beta$ <sup>+</sup> cells intimately associated with  
911 vessels (Red box), consistent with them being pericytes. 100x magnification; scale bar  
912 20  $\mu$ m.  
913  
914



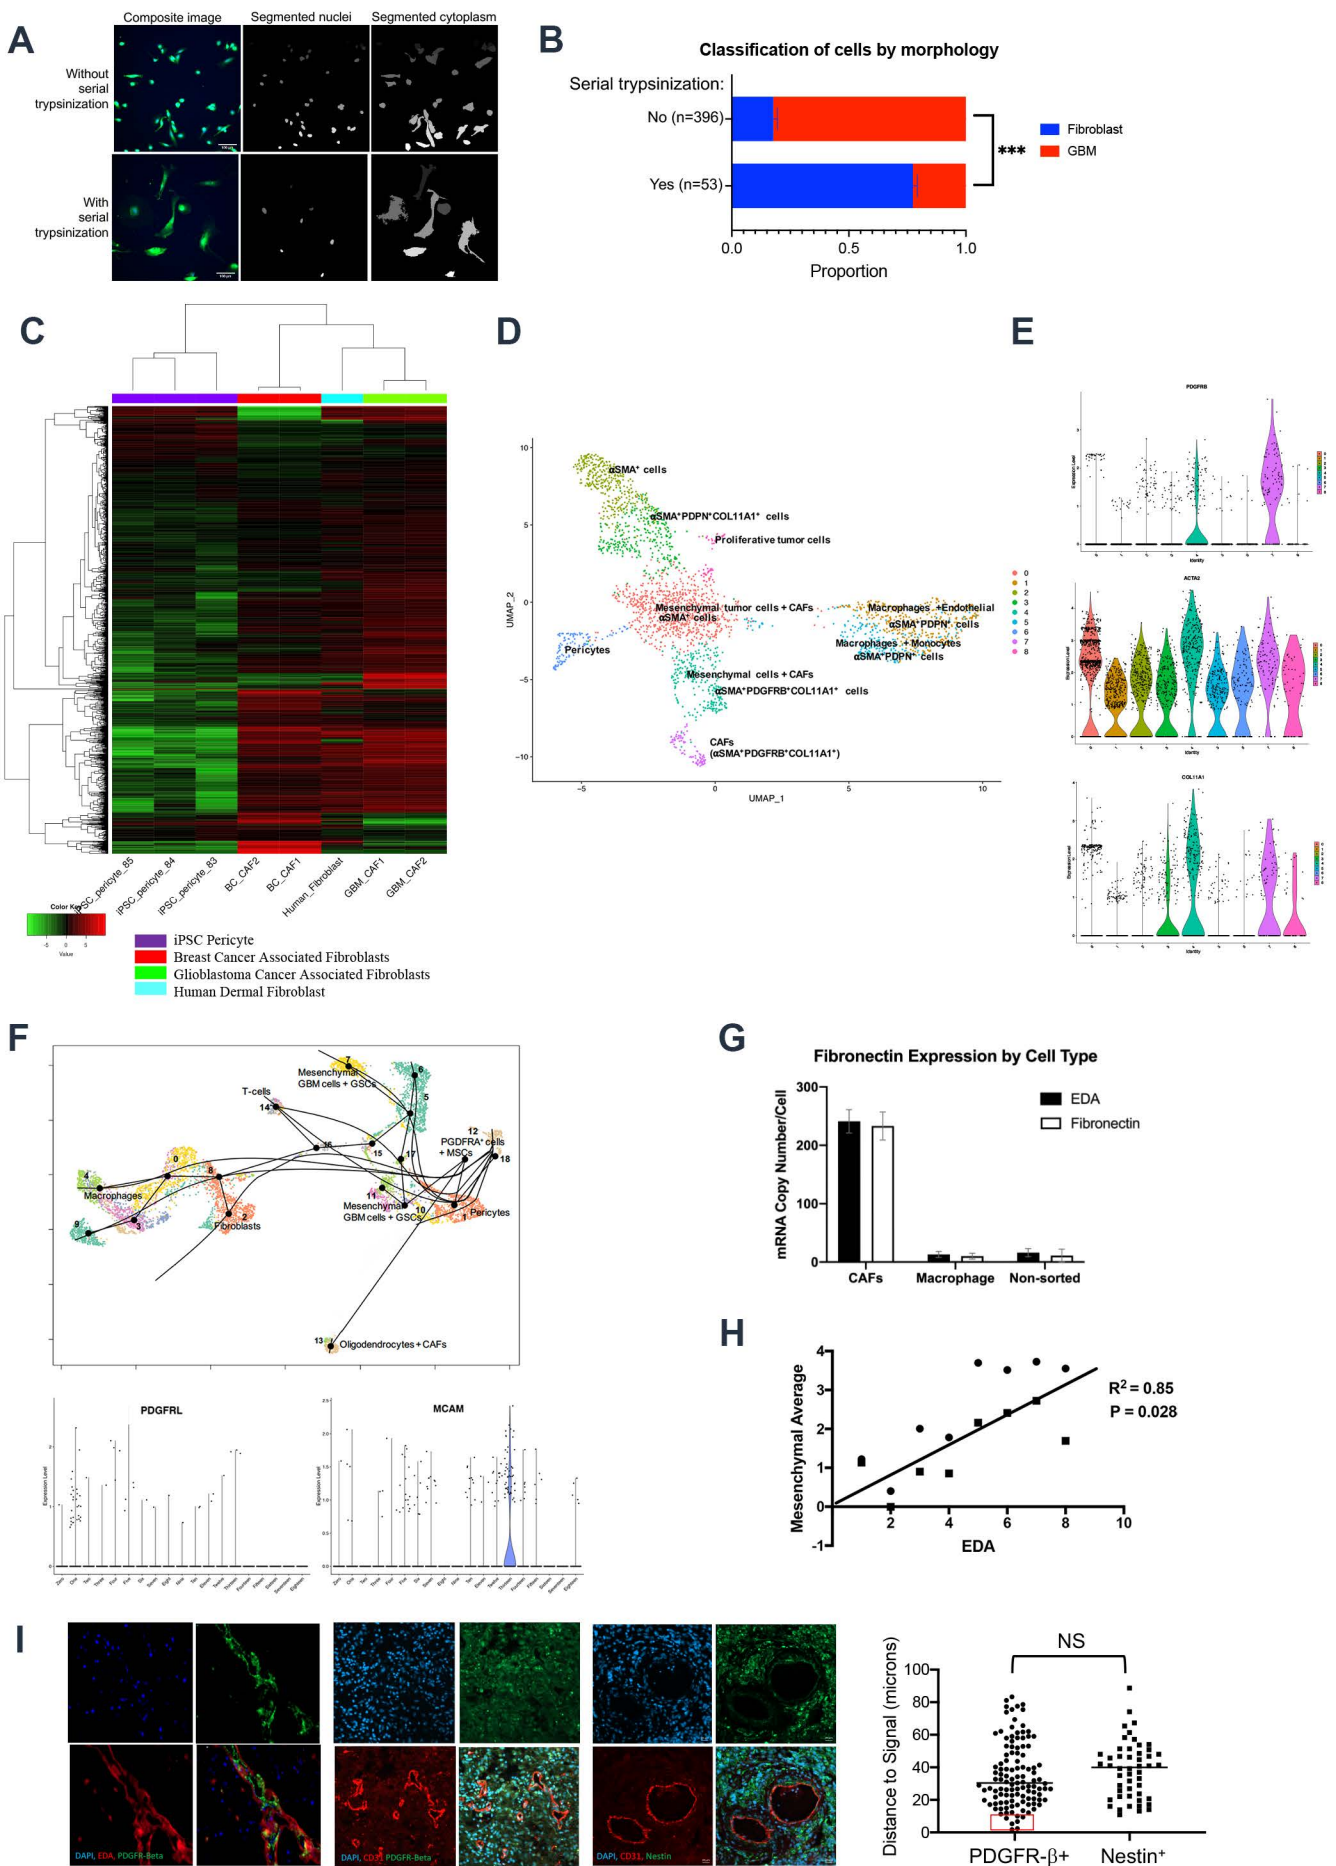

**Figure 1**

915 **Figure 2. CAFs induce pro-tumoral effects of GBM stem cells.** Multiplex  
916 transcriptomic analysis using the NanoString nCounter platform revealed genes in the  
917 cancer progression process upregulated by CAF CM in GBM6 stem cells, as seen by **(A)**  
918 Volcano plot to the left showing significantly ( $P < 0.05$ ) up- (to the right of rightmost vertical  
919 dashed line) and downregulated genes (to the left of leftmost vertical dashed line); **(B)**  
920 heatmap in the middle showing significantly ( $P < 0.05$ ) up- and downregulated genes; and  
921 **(C)** pathway analysis to the right showing that CAF CM upregulated Ras, VEGF, MAPK,  
922 PI3K-Akt, and HIF-1 signaling pathways in GBM stem cells ( $P < 0.002$ ). **(D)** Luciferase-  
923 expressing GBM43-derived neurospheres were grown in neurosphere media or CAF CM  
924 for 72 hours, after which bioluminescence (BLI) was measured, with CAF CM increasing  
925 the BLI significantly ( $P < 0.001$ ). **(E)** Compared to growth in neurosphere media, growth of  
926 neurospheres derived from DBTRG-05MG GBM cells in CAF CM for 24 hours elevated  
927 expression of stem cell genes Nanog 6.7-fold ( $P = 0.009$ ), Sox2 5.0-fold ( $P < 0.001$ ), and  
928 Oct4 3.0-fold ( $P = 0.005$ ) ( $n = 3/\text{group}$ ). **(F)** We mapped of the expression of receptors  
929 expressed by CAFs (**Supp. Table S2**) to that of their cognate ligands/agonists expressed  
930 by GBM6 neurospheres<sup>27</sup> based on a database of 491 known receptor-ligand interactions  
931<sup>58</sup>. Shown are cognate pairs that were co-expressed by GBM CAFs and GSCs for which  
932 the number of FPKM of the ligand is  $> 0.05$  and read counts of the receptor is  $> 10$ , which  
933 represented 174 CAF ligands with receptors expressed by GBM stem cells. **(G)** 1000  
934 GBM6 cells were seeded in a 12-well plate in triplicate with either neurosphere media or  
935 CAF CM with or without antibodies targeting osteopontin (OPN) and/or hepatocyte growth  
936 factor (HGF) for 72 hours. CAF CM induced neurosphere formation as measured by the  
937 total neurosphere area ( $P < 0.001$ ), effects that were mitigated by both anti-HGF ( $P < 0.001$ )



938 and anti-OPN ( $P < 0.001$ ), with the combination of anti-HGF and anti-OPN reducing the  
939 total neurosphere area more than either antibody alone ( $P < 0.001$ ) ( $n = 15$  hpf across 3  
940 wells/group).

941

942

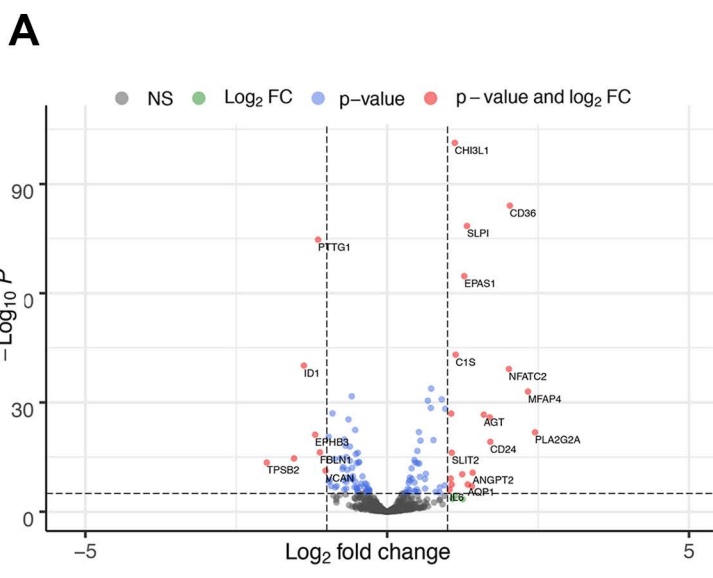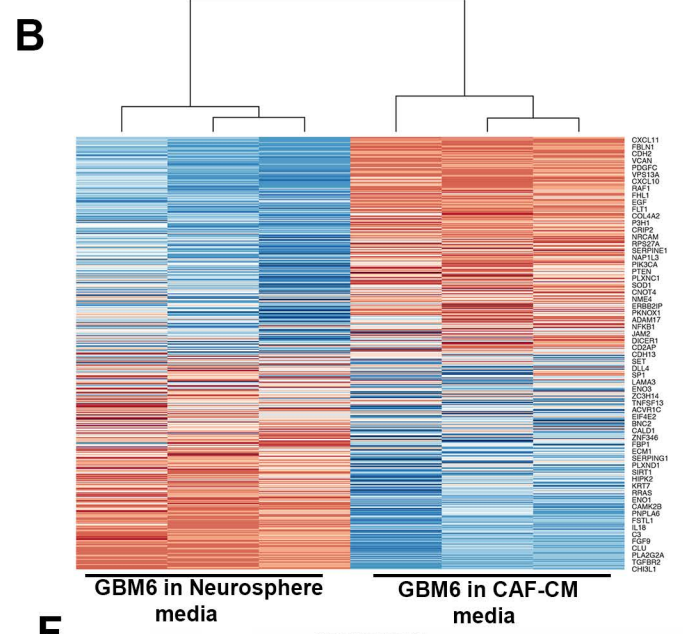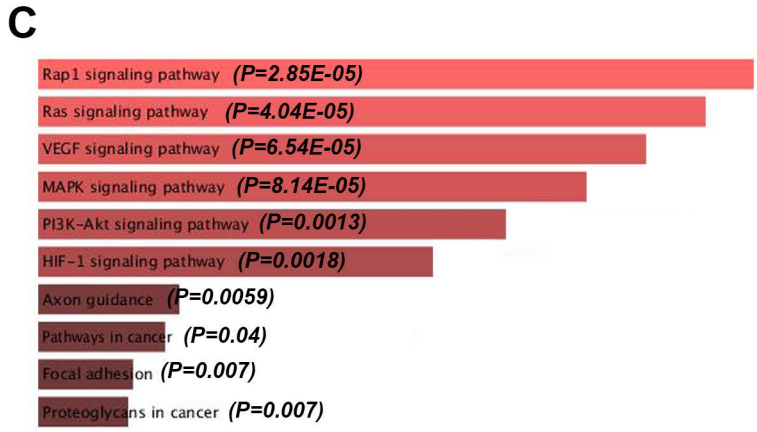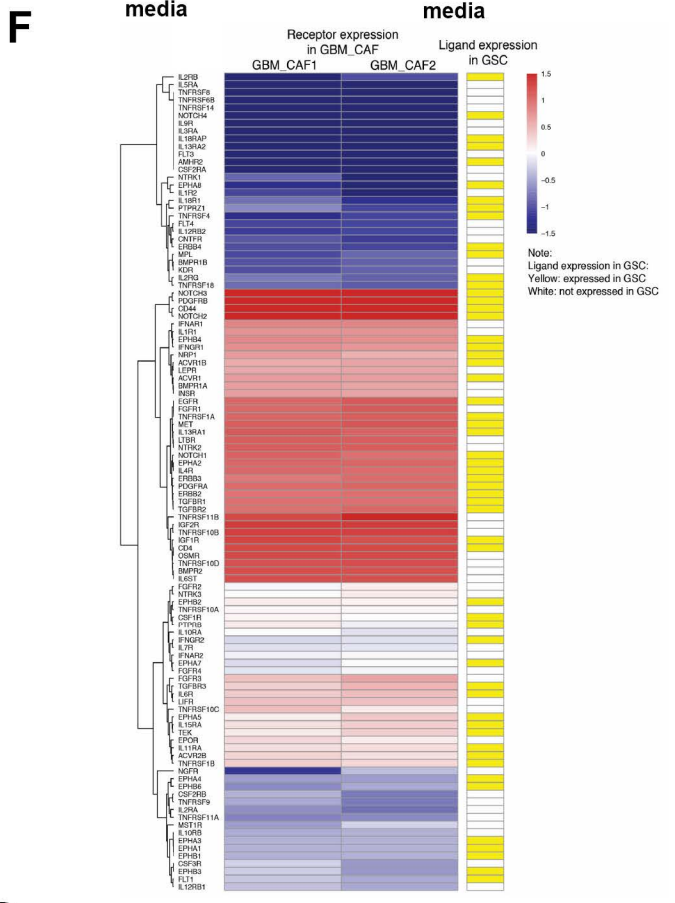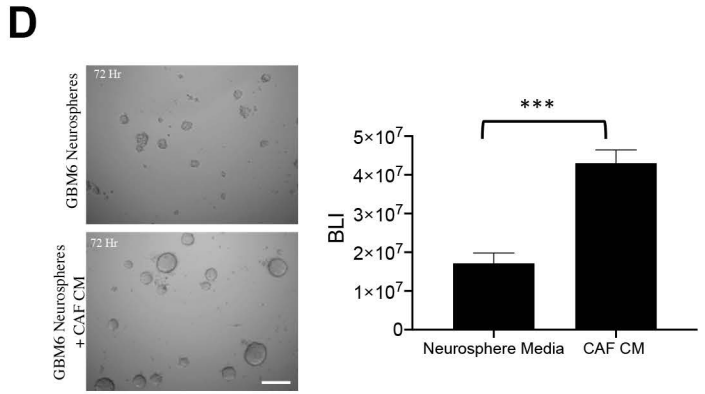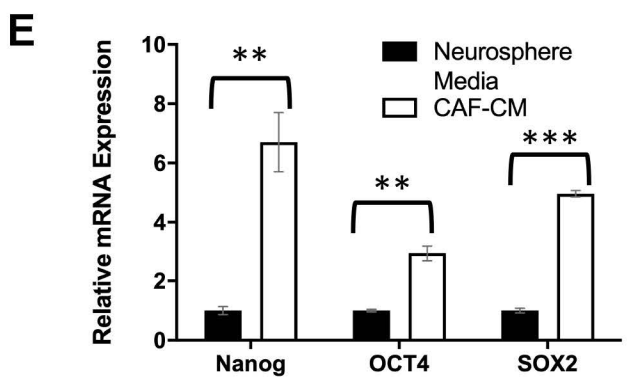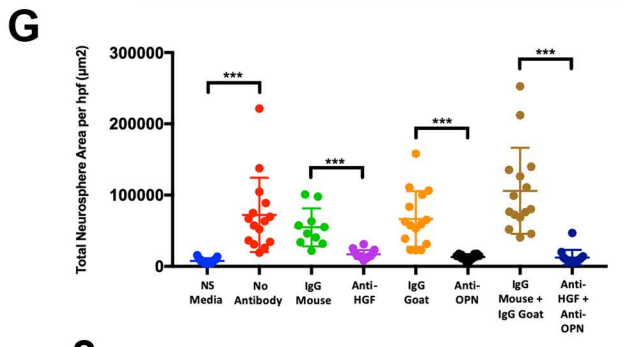

**Figure 2**

Neurospheres in CAF-conditioned neurosphere media

943 **Figure 3. GBM stem cells mediate CAFs invasion and proliferation via PDGF and**  
944 **TGF- $\beta$  pathways.** Compared to neurosphere media, CM from GBM6 stem cell enriched  
945 neurospheres (**A-B**) attracted more cancer-associated fibroblasts (CAFs) in chemotaxis  
946 assays ( $P < 0.001$ ) and (**C**) stimulated CAF proliferation ( $P < 0.001$ ;  $n = 5/\text{group}$ ). (**D**) We  
947 mapped of the expression of receptors expressed by CAFs (**Supp. Table S2**) to that of  
948 their cognate ligands/agonists expressed by GBM6 neurospheres<sup>27</sup> based on a database  
949 of 491 known receptor-ligand interactions<sup>58</sup>. Shown are cognate pairs that were co-  
950 expressed by GBM CAFs and GSCs for which the number of FPKM of the ligand is  $> 0.05$   
951 and read counts of the receptor is  $> 10$ , which represented 189 GBM stem cell ligands  
952 with receptors expressed by CAFs. (**E**) The chemotaxis of CAFs towards GBM6  
953 neurosphere CM was abrogated by neutralizing antibodies against PDGF, but not TGF-  
954  $\beta$ . TGF- $\beta$  neutralizing antibodies did not abrogate invasion at 2.5-10  $\mu\text{g}/\text{mL}$  ( $P = 0.2-0.4$ ).  
955 PDGF neutralizing antibodies reduced the number of invading cells at 5 and 10  $\mu\text{g}/\text{ml}$   
956 ( $P = 0.002$ ). (**F**) While neutralizing antibodies against PDGF ( $P = 0.7-0.9$ ) or TGF- $\beta$  ( $P = 0.5-$   
957  $0.9$ ) did not affect GBM stem cell CM-induced CAF proliferation, the combination of  
958 neutralizing antibodies against PDGF and TGF- $\beta$  reversed GBM stem cell-induced CAF  
959 proliferation ( $P = 0.002-0.02$ ) ( $n = 5/\text{group}$ ). \*  $P < 0.05$ ; \*\*  $P < 0.01$ ; \*\*\*  $P < 0.001$ .

960

961

**A**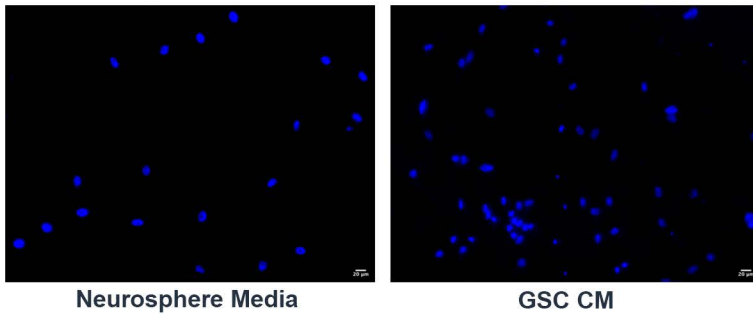**B****Invasion Assay of CAFs**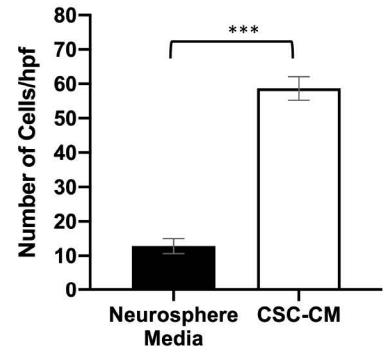**C**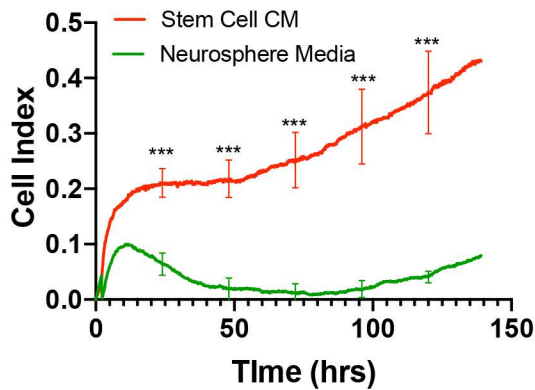**D**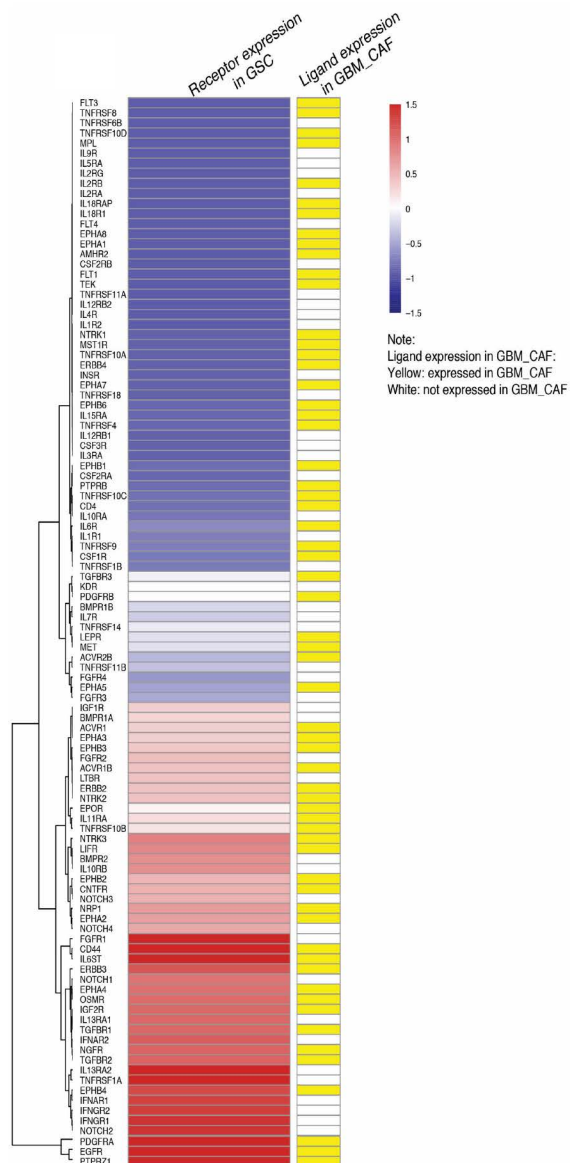**E**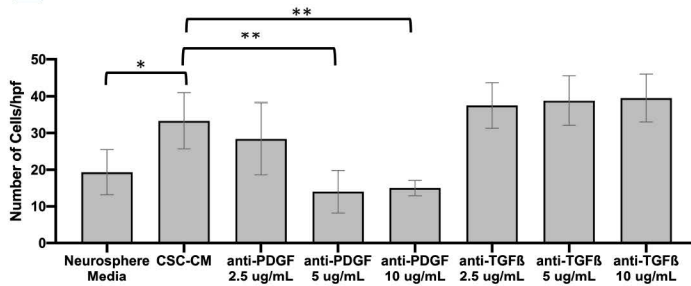**F**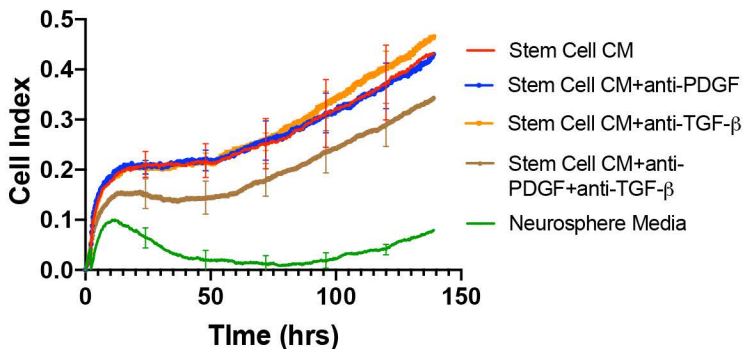**Figure 3**

962 **Figure 4. GBM CAFs induce angiogenesis and M2 macrophage polarization in**  
963 **culture. (A)** Angiogenesis assays in cultured HUVEC cells revealed that CAF CM  
964 enhanced all stages of angiogenesis: expansion metrics at 4 hours ( $P=0.003$ ); extension  
965 metrics at 8 hours ( $P<0.001$ ), and fusion metrics at 16 hours ( $P=0.02$ ). Serial CM taken  
966 from GBM cells grown in CAF CM enhanced fusion metrics at 16 hours more than CAF  
967 CM ( $P<0.001$ ) ( $n=6$ /group). We then assessed the effect of CAF CM on macrophage  
968 polarization using ratio of gene expression assessed by qPCR of three M2 genes (*ARG1*,  
969 *TGFB1*, and *MMP9*) to three M1 genes (*NOS2*, *CXCL10*, and *IL1B*). **(B)** CAF CM and the  
970 EDA splice variant of fibronectin that they produce caused M2 polarization of cultured  
971 macrophages derived from human monocytes isolated from peripheral blood in a manner  
972 not seen with plasma fibronectin lacking the EDA splice variant ( $n=3$ /group;  $P=0.01$ ). **(C)**  
973 When the THP-1 immortalized monocyte-like cell line was differentiated into  
974 macrophages followed by incubation in CAF CM, CAF CM drove more M2 polarization  
975 than achieved with a cytokine positive control known to drive M2 polarization ( $n=3$ /group;  
976  $P=0.03$ ). **(D)** The effects of CAF CM on M2 polarization of cultured macrophages derived  
977 from human monocytes isolated from peripheral blood were reversed by a blocking  
978 antibody against toll-like receptor 4 (TLR4), a known receptor for EDA fibronectin  
979 ( $n=3$ /group;  $P=0.01$ ). CAFs did not induce **(E)** macrophage proliferation ( $n=3$ /group;  
980  $P=0.3-0.9$ ) or **(F)** chemotaxis ( $n=3$ /group;  $P=0.7$ ). \*  $P<0.05$ ; \*\*  $P<0.01$ ; \*\*\*  $P<0.001$ .

981

982

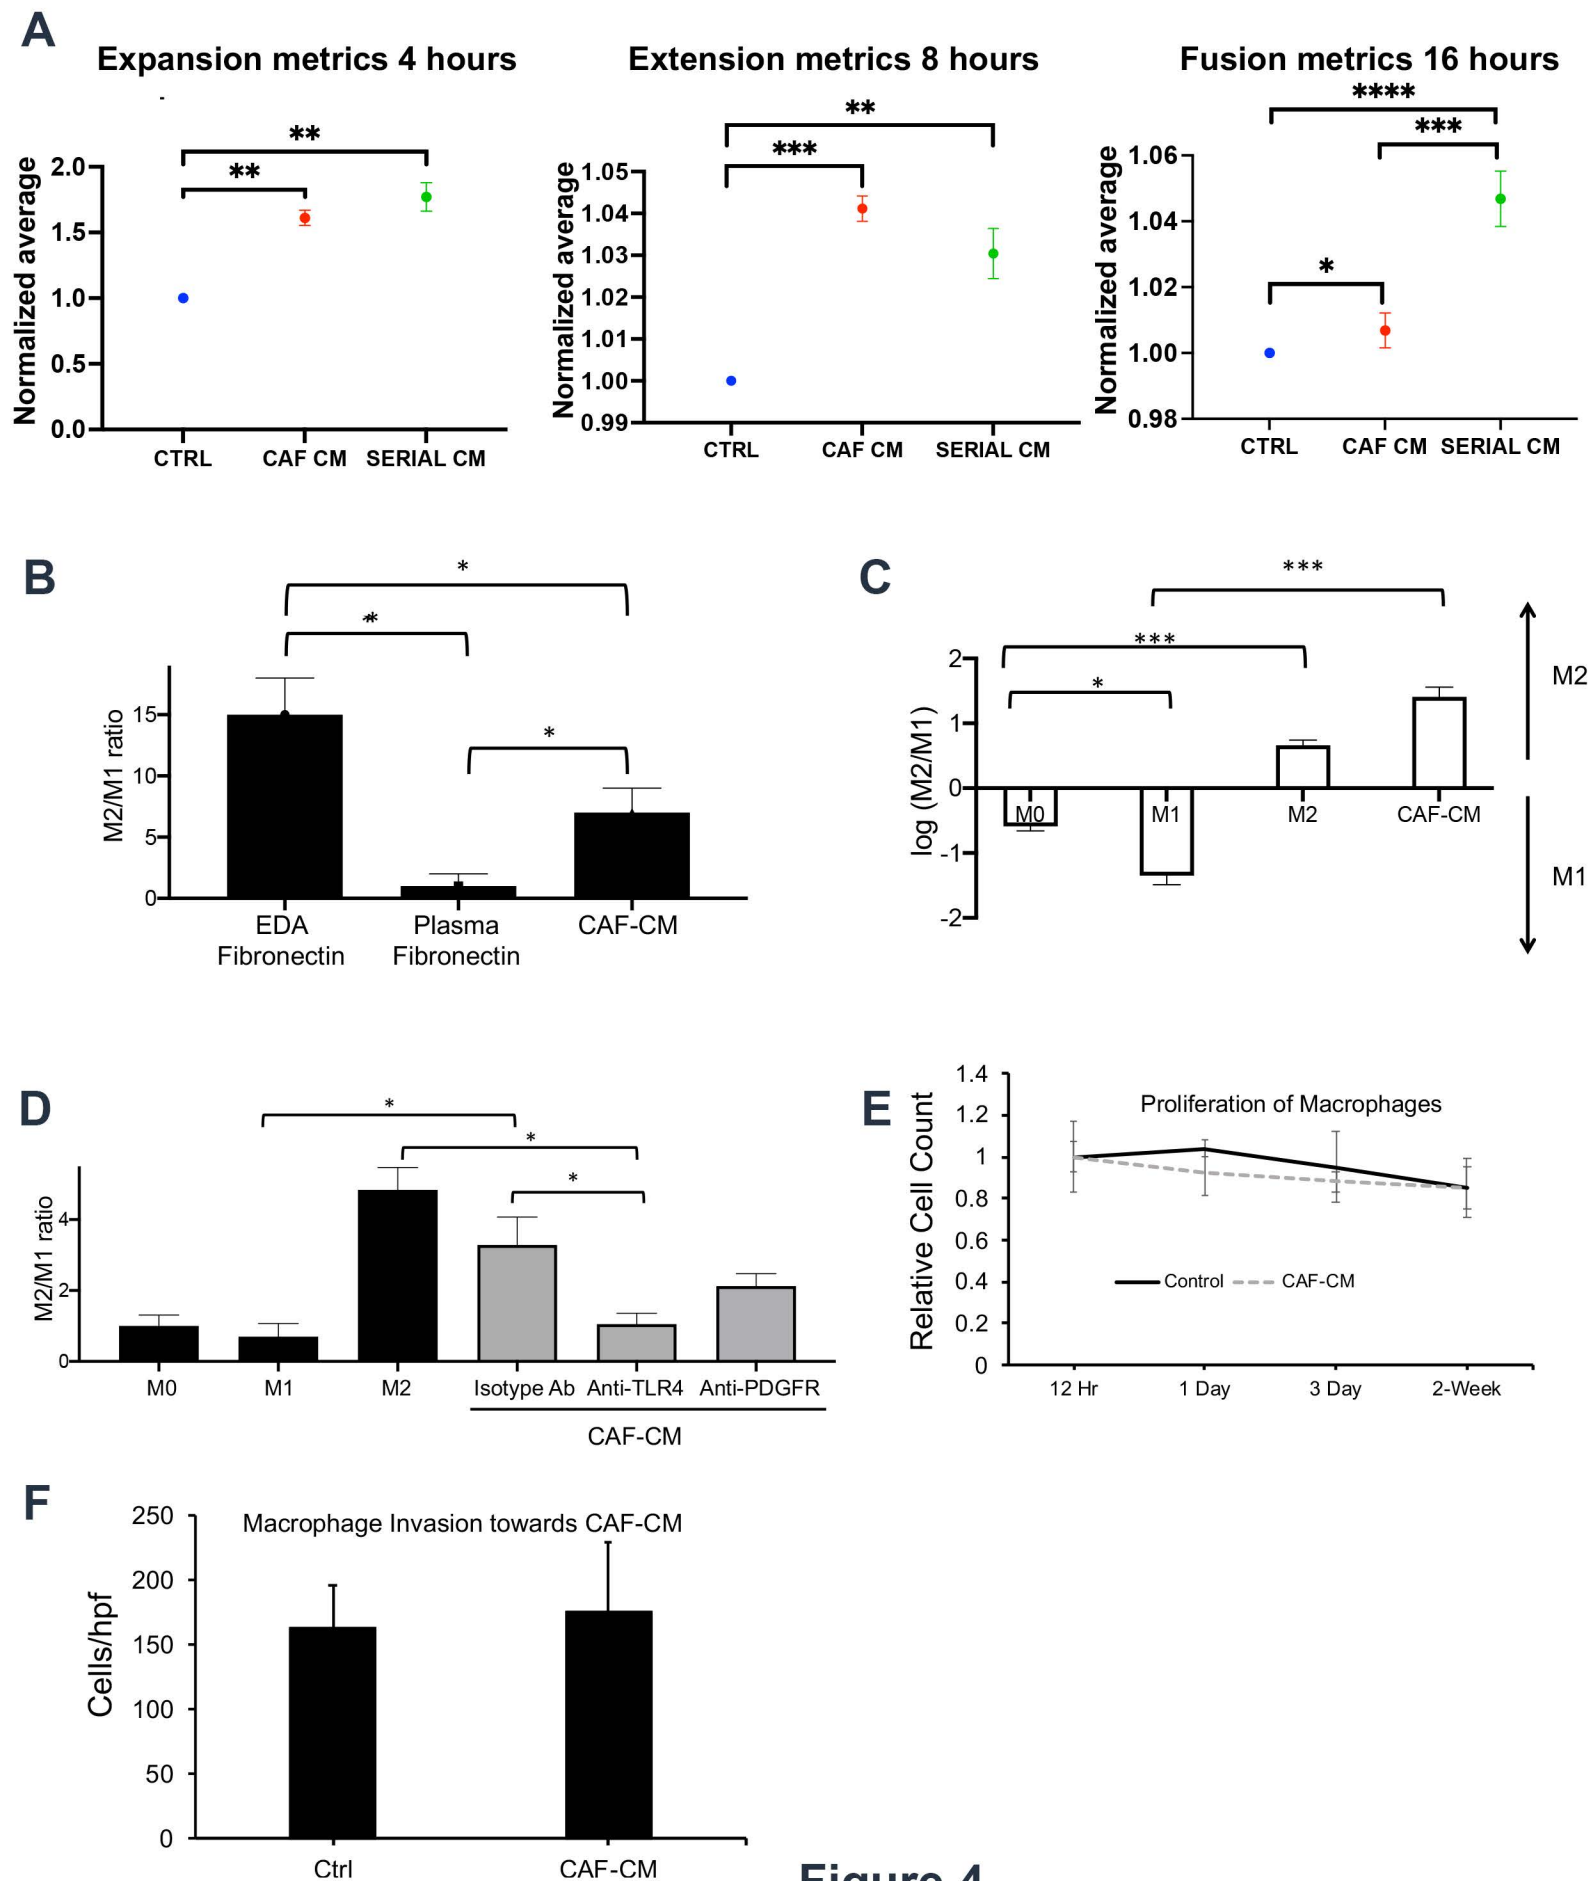

**Figure 4**

983 **Figure 5. Regional variation of CAF localization in GBM. (A)** Schema of where site-  
984 directed biopsies from patient GBMs were taken. **(B)** qPCR for total and EDA fibronectin  
985 revealed comparable elevation of both in SVZ GBM compared to the PBZ, leading edge,  
986 and tumor core (n=3/group). **(C)** IF confirmed elevated EDA (green) and total fibronectin  
987 (red) in SVZ GBM compared to the tumor core; **(D)** Flow cytometry for CAF marker  $\alpha$ -  
988 SMA reveals elevation in the SVZ compared to the tumor core (n=3 paired specimens;  
989 P=0.02). **(E)** IF confirmed elevated staining of CAF marker PDGFR- $\alpha$  in the SVZ  
990 compared to the tumor core. **(F)** IF revealed no PDGFR- $\alpha$  or EDA staining in the SVZ of  
991 a GBM patient whose tumor did not involve the SVZ. 100x magnification; Scale bar 30  
992  $\mu$ M. \* P<0.05; \*\* P<0.01; \*\*\* P<0.001. **(G)** Total and EDA fibronectin expression by qPCR  
993 was elevated in SVZ GBM but virtually undetectable in tumor-free SVZ from epilepsy  
994 surgery (n=3).  
995  
996



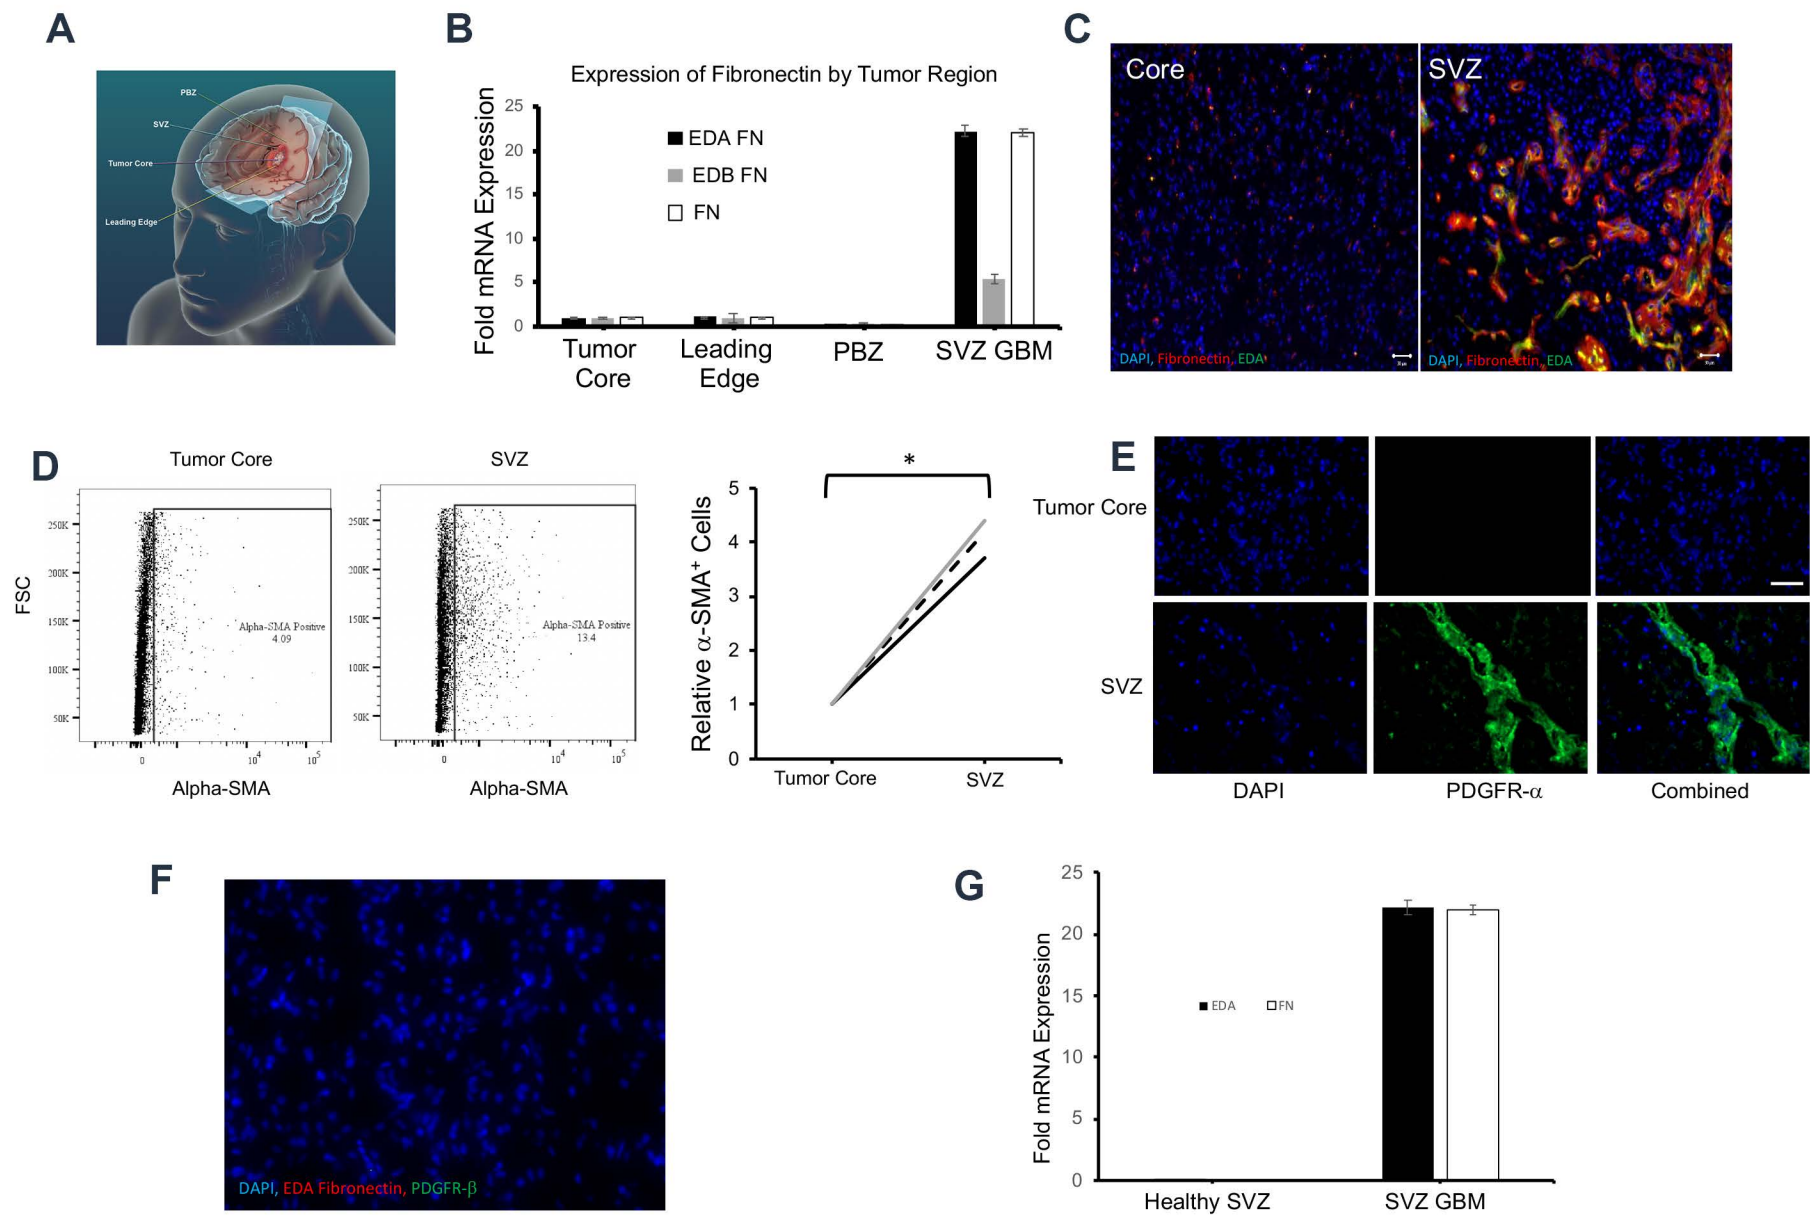

**Figure 5**



997 **Figure 6. CAFs induce GBM tumor growth intracranially *in vivo*.** (A) Kaplan-Meier  
998 curve showing intracranial implantation of  $3.5 \times 10^4$  GBM6 neurospheres with  $5 \times 10^3$  CAFs  
999 reduced survival compared to mice receiving  $4.0 \times 10^4$  GBM6 neurospheres, a threshold  
1000 not associated with tumor formation in most mice ( $n=10/\text{group}$ ;  $P=0.03$ ). Compared to  
1001 mice receiving  $10^5$  GBM6 cells in neurospheres (higher number used to generate tumors),  
1002 intracranial implantation of  $3.5 \times 10^4$  GBM6 neurospheres with  $5 \times 10^3$  CAFs led to  
1003 transcriptional changes as determined by NanoString nCounter multiplex analysis,  
1004 revealing genes in the cancer progression process upregulated by CAFs in GBM6  
1005 neurosphere-derived xenografts as seen by (B) Volcano plot to the left showing  
1006 significantly ( $P < 0.05$ ) up- (to the right of rightmost vertical dashed line) and downregulated  
1007 genes (to the left of leftmost vertical dashed line), (C) heatmap in the middle showing  
1008 significantly ( $P < 0.05$ ) up- and downregulated genes, and (D) pathway analysis to the right  
1009 showing that CAFs upregulated HIF-1, central carbon metabolism, adherens junctions,  
1010 and TGF- $\beta$  signaling pathways in GBM6 tumors ( $P < 0.003$ ); (E-F) led to increased vessel  
1011 diameter ( $P < 0.001$ ) and increased total vessel surface area ( $P < 0.001$ ) (3 mice/group; 8  
1012 fields/mouse); and (G) increased the percentage of macrophages that were CD206<sup>+</sup> M2  
1013 pro-tumoral macrophages in GBM6 neurosphere-derived tumors ( $P=0.0096$ ). 100x  
1014 magnification; Scale bar 20  $\mu\text{M}$ . \*  $P < 0.05$ ; \*\*  $P < 0.01$ ; \*\*\*  $P < 0.001$ .

1015

1016

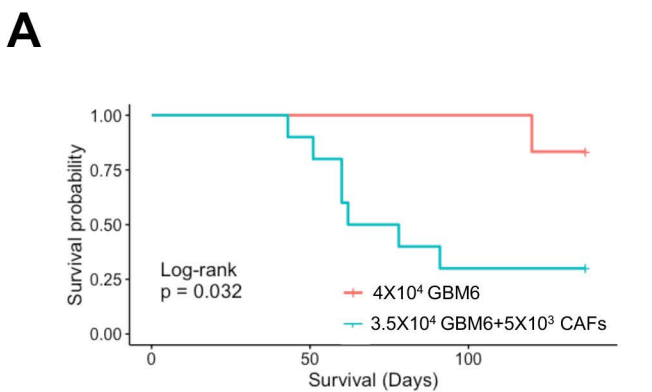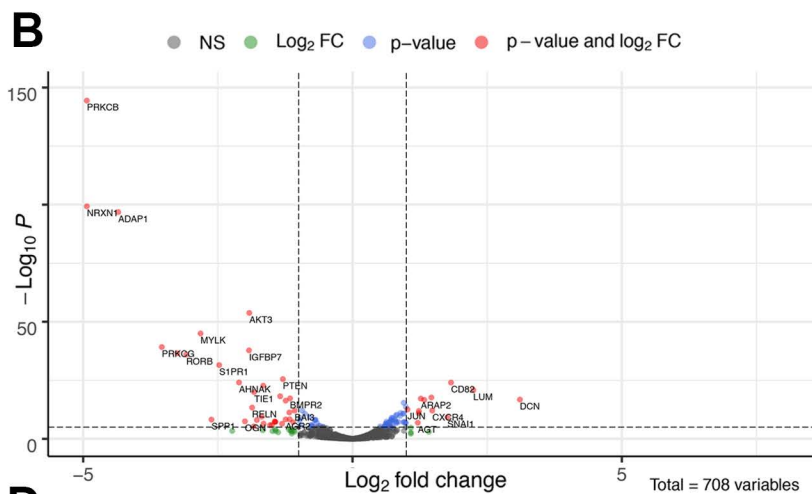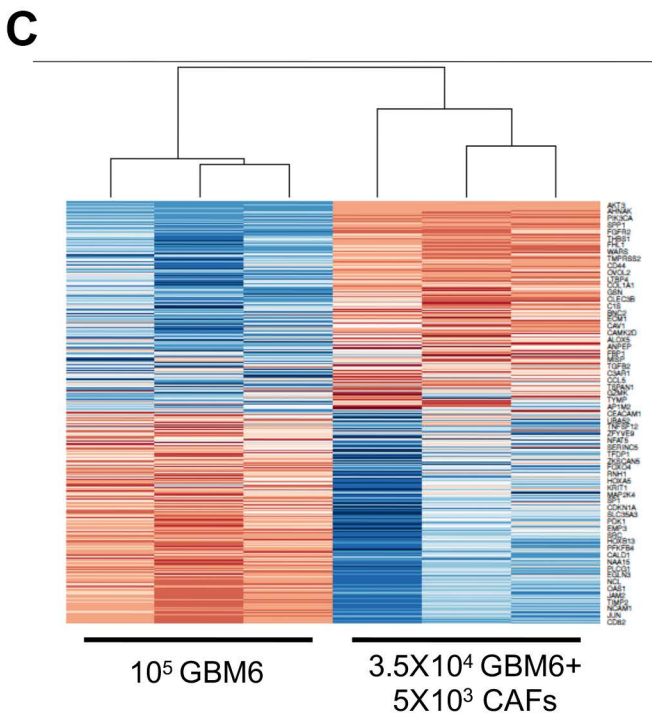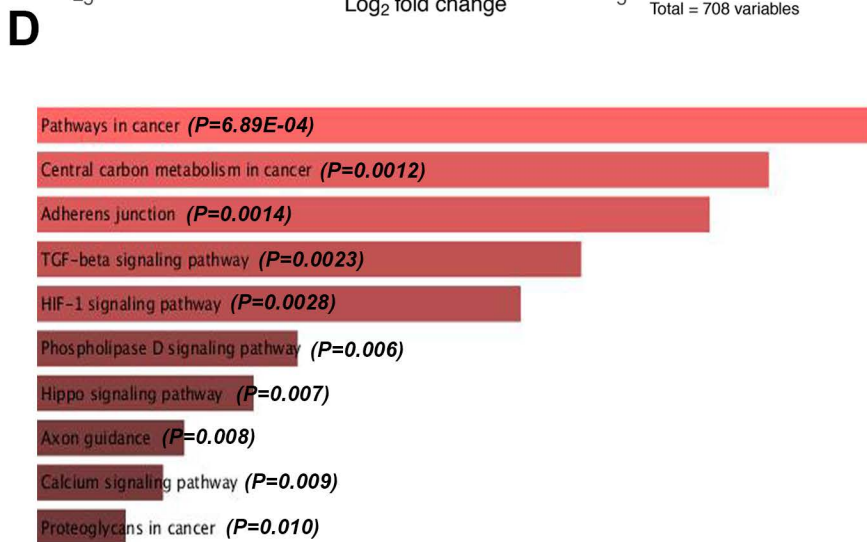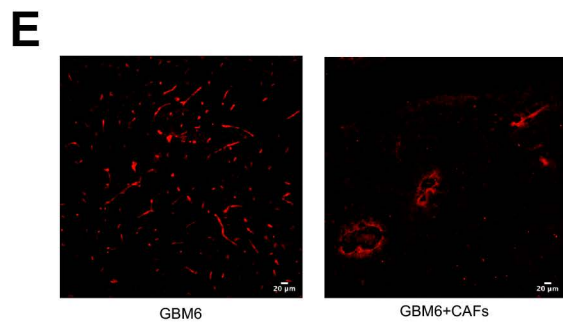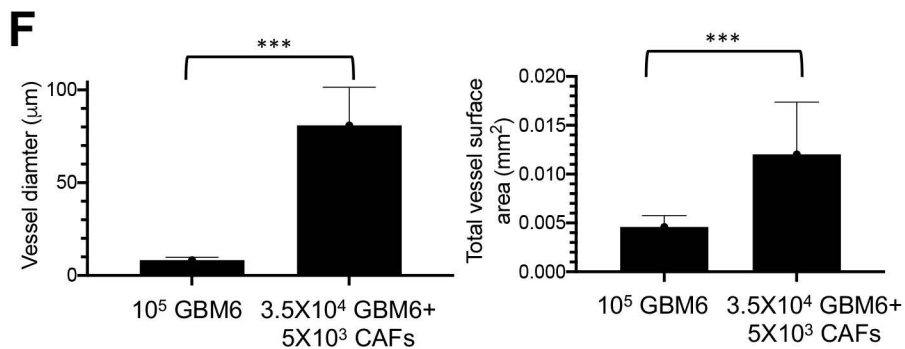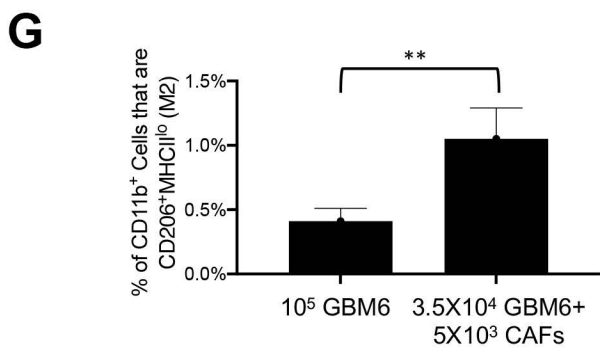

**Figure 6**

1017 **Figure 7. Summary of interactions between CAFs and GSCs in the perivascular**  
1018 **niche of GBM.** Shown are the interactions between CAFs and GSCs in the GBM  
1019 perivascular niche that we demonstrated. GSCs recruit CAFs via PDGF- $\beta$  secretion;  
1020 CAFs promote GSC proliferation via HGF and osteopontin secretion; and GSCs promote  
1021 CAF proliferation via TGF $\beta$  and PDGF- $\beta$  secretion. CAFs also exert pro-tumoral effects  
1022 on other cells in the GBM microenvironment by stimulating angiogenesis and M2  
1023 macrophage polarization.

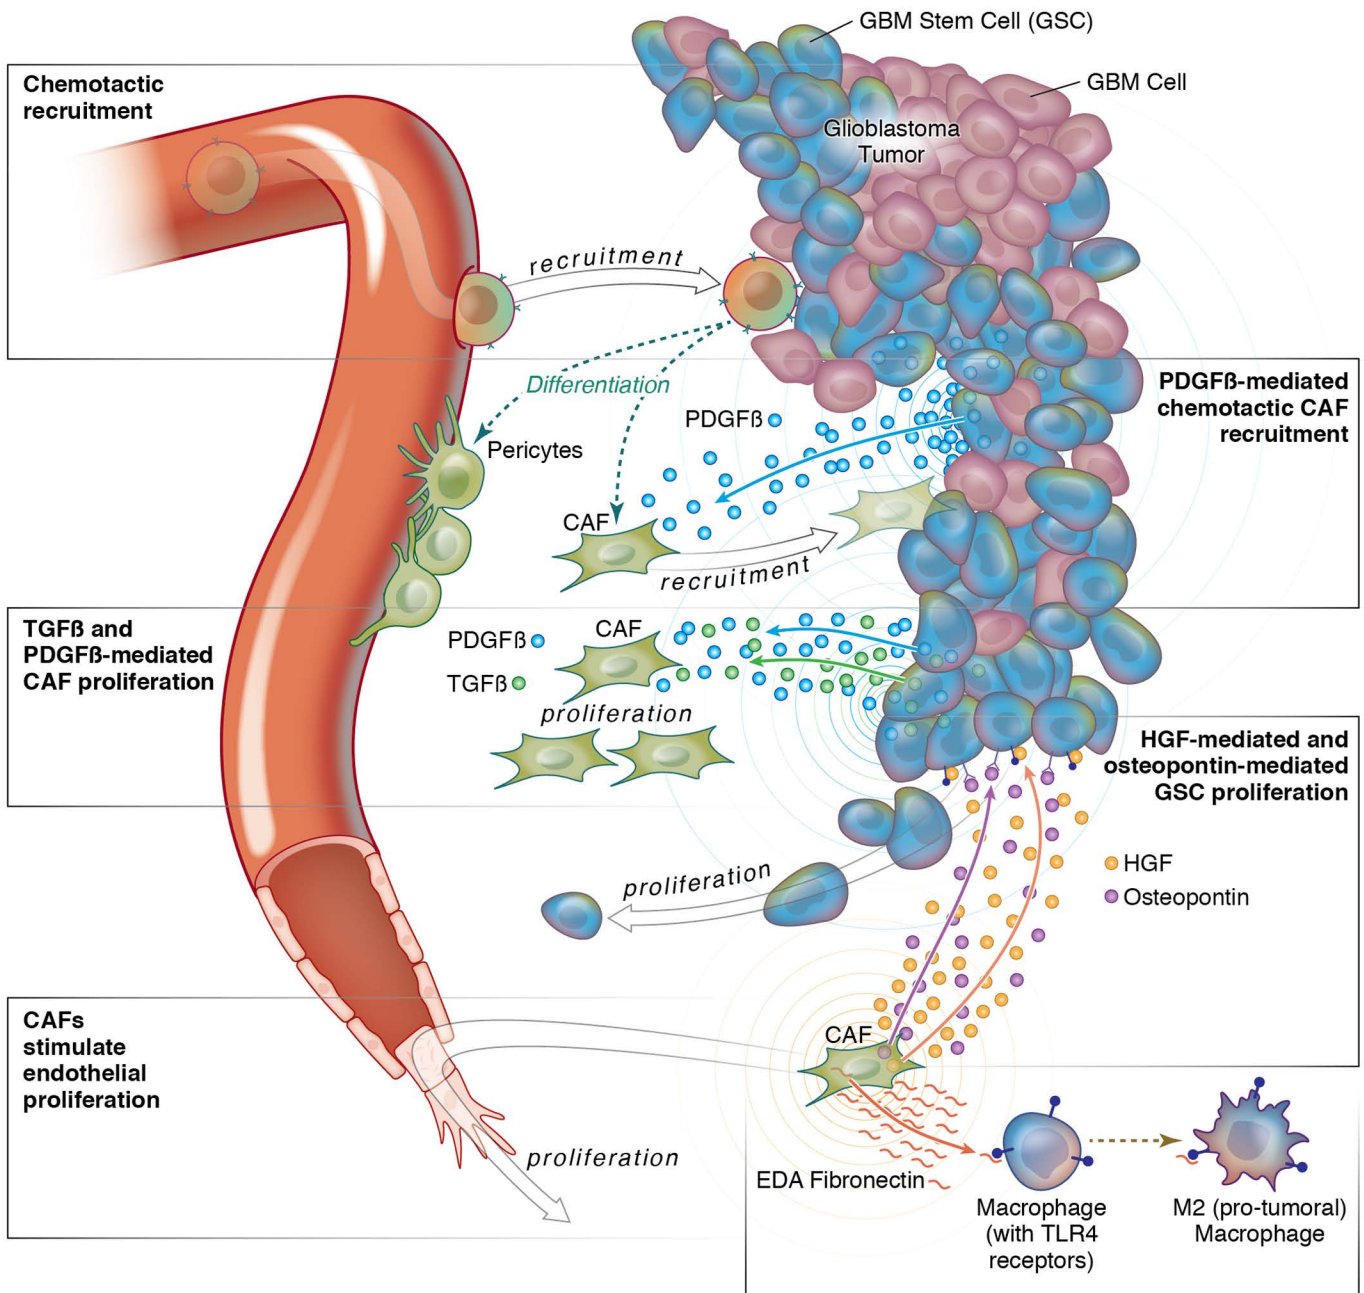

**Figure 7**
